# Supplementary material for: HOX genes promote cell proliferation and are potential therapeutic targets in adrenocortical tumours
Source: PubMed Central journal article supplement (PMC7884796; doi:10.1038/s41416-020-01166-z), 2020-11-20
Supplement: 41416_2020_1166_MOESM1_ESM.pdf [file 41416_2020_1166_MOESM1_ESM.pdf]

## **Supplementary methods**

### **Immunohistochemistry**

Mouse tissues were fixed overnight in 4% paraformaldehyde (PFA), dehydrated in an ethanol gradient series, washed in HistoClear and embedded in wax. Sections were cut at 4  $\mu$ m, rehydrated and antigen retrieval was obtained by gently boiling sections for 20 minutes in the appropriate buffer, see below, and then cooled. Sections were treated with 3% H<sub>2</sub>O<sub>2</sub> to block endogenous peroxidase activity, washed with PBS and blocked in 10% sheep serum. Primary antibodies in 2.5% horse serum were incubated overnight at 4°C. Anti-mouse or anti-rabbit ImmPRESS HRP detection kits (Vector Laboratories), or anti-sheep VisUCyte HRP detection reagent (Bio-Techne) were used according to manufacturer's instructions. Staining was carried out using DAB chromogen (Sigma) and sections were counterstained with haematoxylin. For all stains, sections were processed from at least three animals of each genotype. The following antibodies were processed for antigen retrieval in citrate buffer (0.1 M sodium citrate pH6, 0.05% Tween); Ki67 (Abcam ab16667), Hoxb9 (Santa Cruz sc-398500), Sf-1 (Abcam ab65815), DAB2 (BD Transduction Labs 610464), Tyrosine Hydroxylase (Merck AB152), 20 $\alpha$  HSD (a kind gift from Yacob Weinstein),  $\beta$ -catenin (BD Transduction Labs 610153), Lef1 (Cell Signalling Technology 2230), cleaved Caspase 3 (Abcam ab2302), Fosb (Cell Signalling Technology 2251). Antigen retrieval for Cyp11b1 (2625, a kind gift from Celso Gomez-Sanchez) and Cyp11b2 (2084, a kind gift from Celso Gomez-Sanchez) antibodies was 1 mM EDTA, 10 mM Diethanolamine pH 9.

### **Taqman gene expression probes**

Gapdh Mm99999915\_g1, Hoxb9 Mm01700220\_m1, Sf-1/Nr5a1 Mm00446826\_m1, Shh Mm00436528\_m1, Ptch1 Mm00436026\_m1, Axin2 Mm00443610\_m1, Cyp11b1

Mm01204952\_m1, Cyp11b2 Mm01204955\_g1, Akr1c18 Mm00506289\_m1, Pik3c2g  
Mm00440781\_m1, Cdk1 Mm00772472\_m1, Ccnb1 Mm03053893\_gH, Ccnb2  
Mm01171453\_m1, Ccne1 Mm01266311\_m1, Knstrn Mm00518200\_m1, Fos  
Mm00487425\_m1, Fosb Mm00500401\_m1, JunB Mm00492781\_s1, GAPDH  
Hs03929097\_g1, PBX1 Hs00231228\_m1, HOXA10 Hs00538183\_m1, HOXA11  
Hs00194149\_m1, HOXA13 Hs00426284\_m1, LEF1 Hs01547250\_m1, AXIN2  
Hs00610344\_m1.



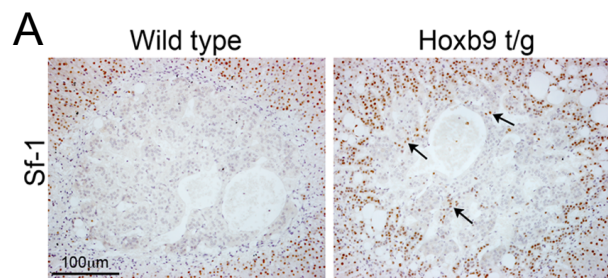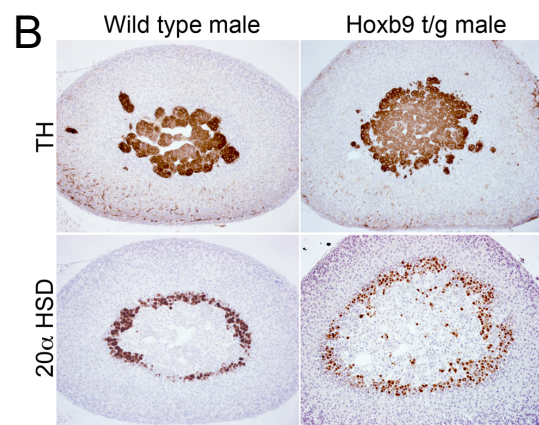

**Figure S2.** (A) Sf-1 IHC stain on sections of wild type and Hoxb9 t/g female adrenals from 3-month-old animals. Arrows indicate positive cells in the medulla. (B) TH and 20 $\alpha$ -HSD IHC stains on sections of wild type and Hoxb9 t/g male adrenal glands from 3-week-old animals.

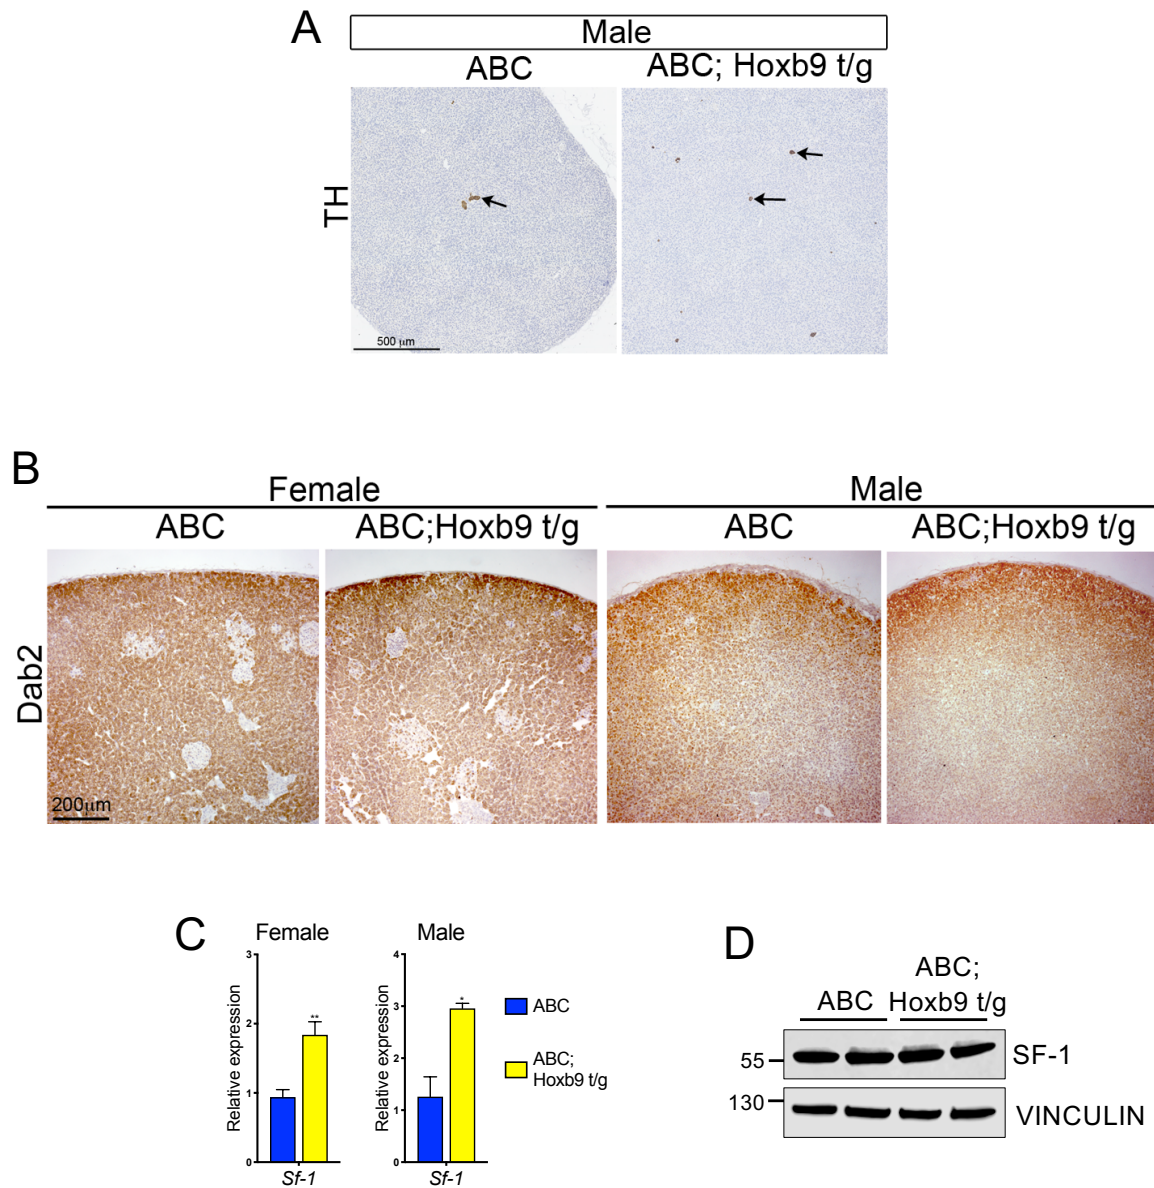

**Figure S3.** (A) Medulla marker TH stains on sections of ABC and ABC; Hoxb9 t/g male 3-month-old adrenal tumours. Arrows indicate few positive cells in these tumours. (B) ZG marker Dab2 stains on sections of ABC and ABC; Hoxb9 t/g 3-month-old adrenals showing expression throughout the tumours. (C) qRT-PCR of *Sf-1* on ABC and ABC; Hoxb9 t/g adrenal tumours. The data represent mean  $\pm$  SD from three biological repeats. Students t-test, \*\*  $p < 0.01$ , \*  $p < 0.05$ . (D) Western blot analysis of SF-1 on ABC and ABC; Hoxb9 t/g adrenal tumours from female animals. Adrenals from 2 animals of each genotype are shown. Vinculin is used as a loading control. ABC indicates *Ctnnb1* mutant tumours, ABC; Hoxb9 t/g indicates double mutant tumours.

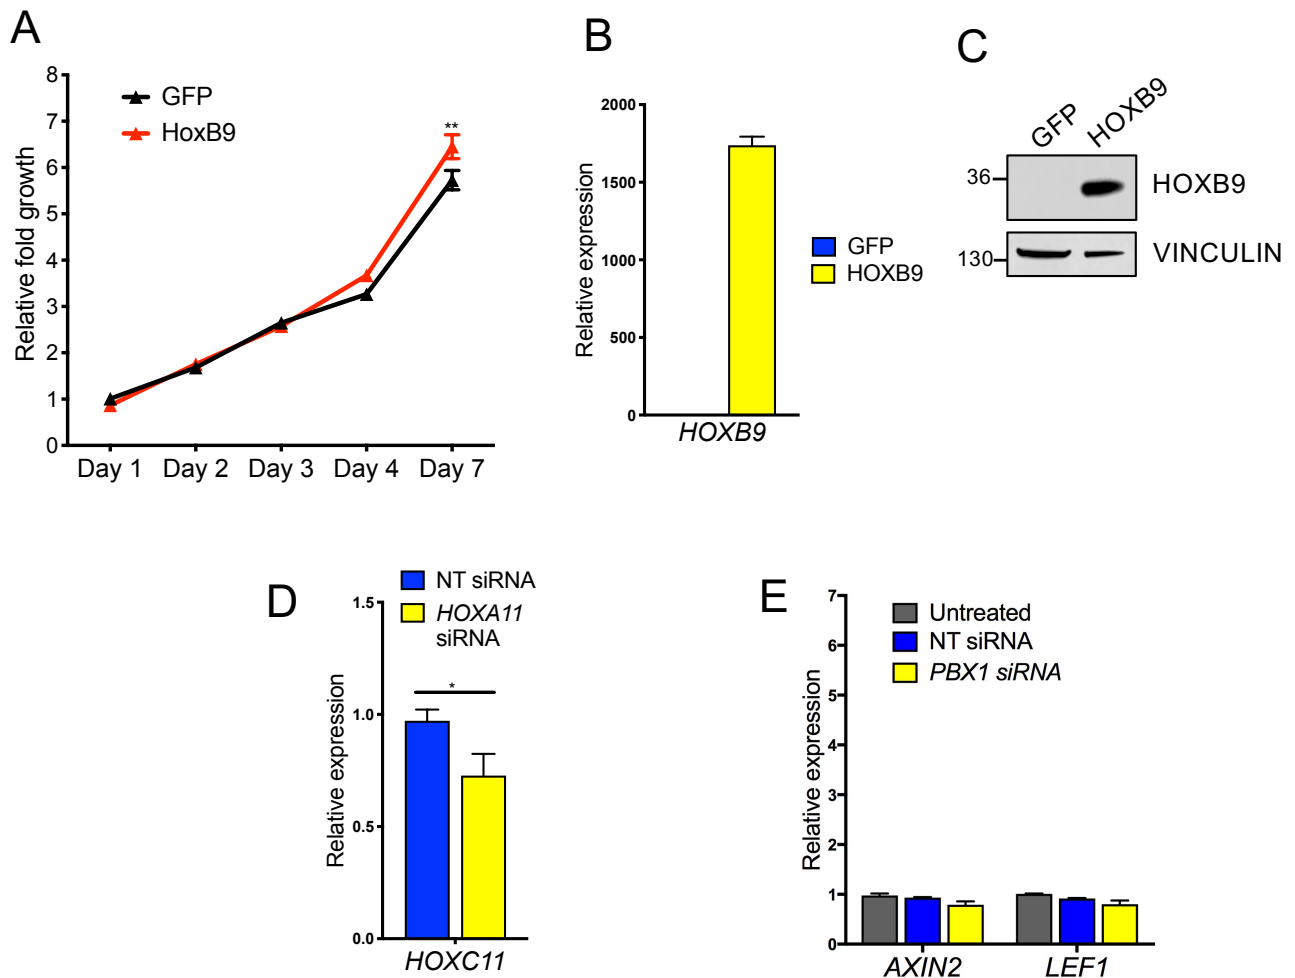

**Figure S4.** (A) Growth curve of H295R cells expressing GFP or HOXB9. The data represent mean  $\pm$  SD from three biological repeats. One-way ANOVA, \*\*  $p < 0.01$ . (B) qRT-PCR of *HOXB9* in H295R cells expressing GFP or HOXB9. (C) Western blot analysis of HOXB9 in H295R cells expressing GFP or HOXB9. Vinculin is used as a loading control. (D) qRT-PCR of *HOXC11* in H295R cells treated with a NT siRNA or an siRNA targeting *HOXA11*. \*  $p < 0.05$ . (E) qRT-PCR of *AXIN2* and *LEF1* in H295R cells untreated, treated with a NT siRNA or an siRNA targeting *PBX1*. The data represent mean  $\pm$  SD from three biological repeats.

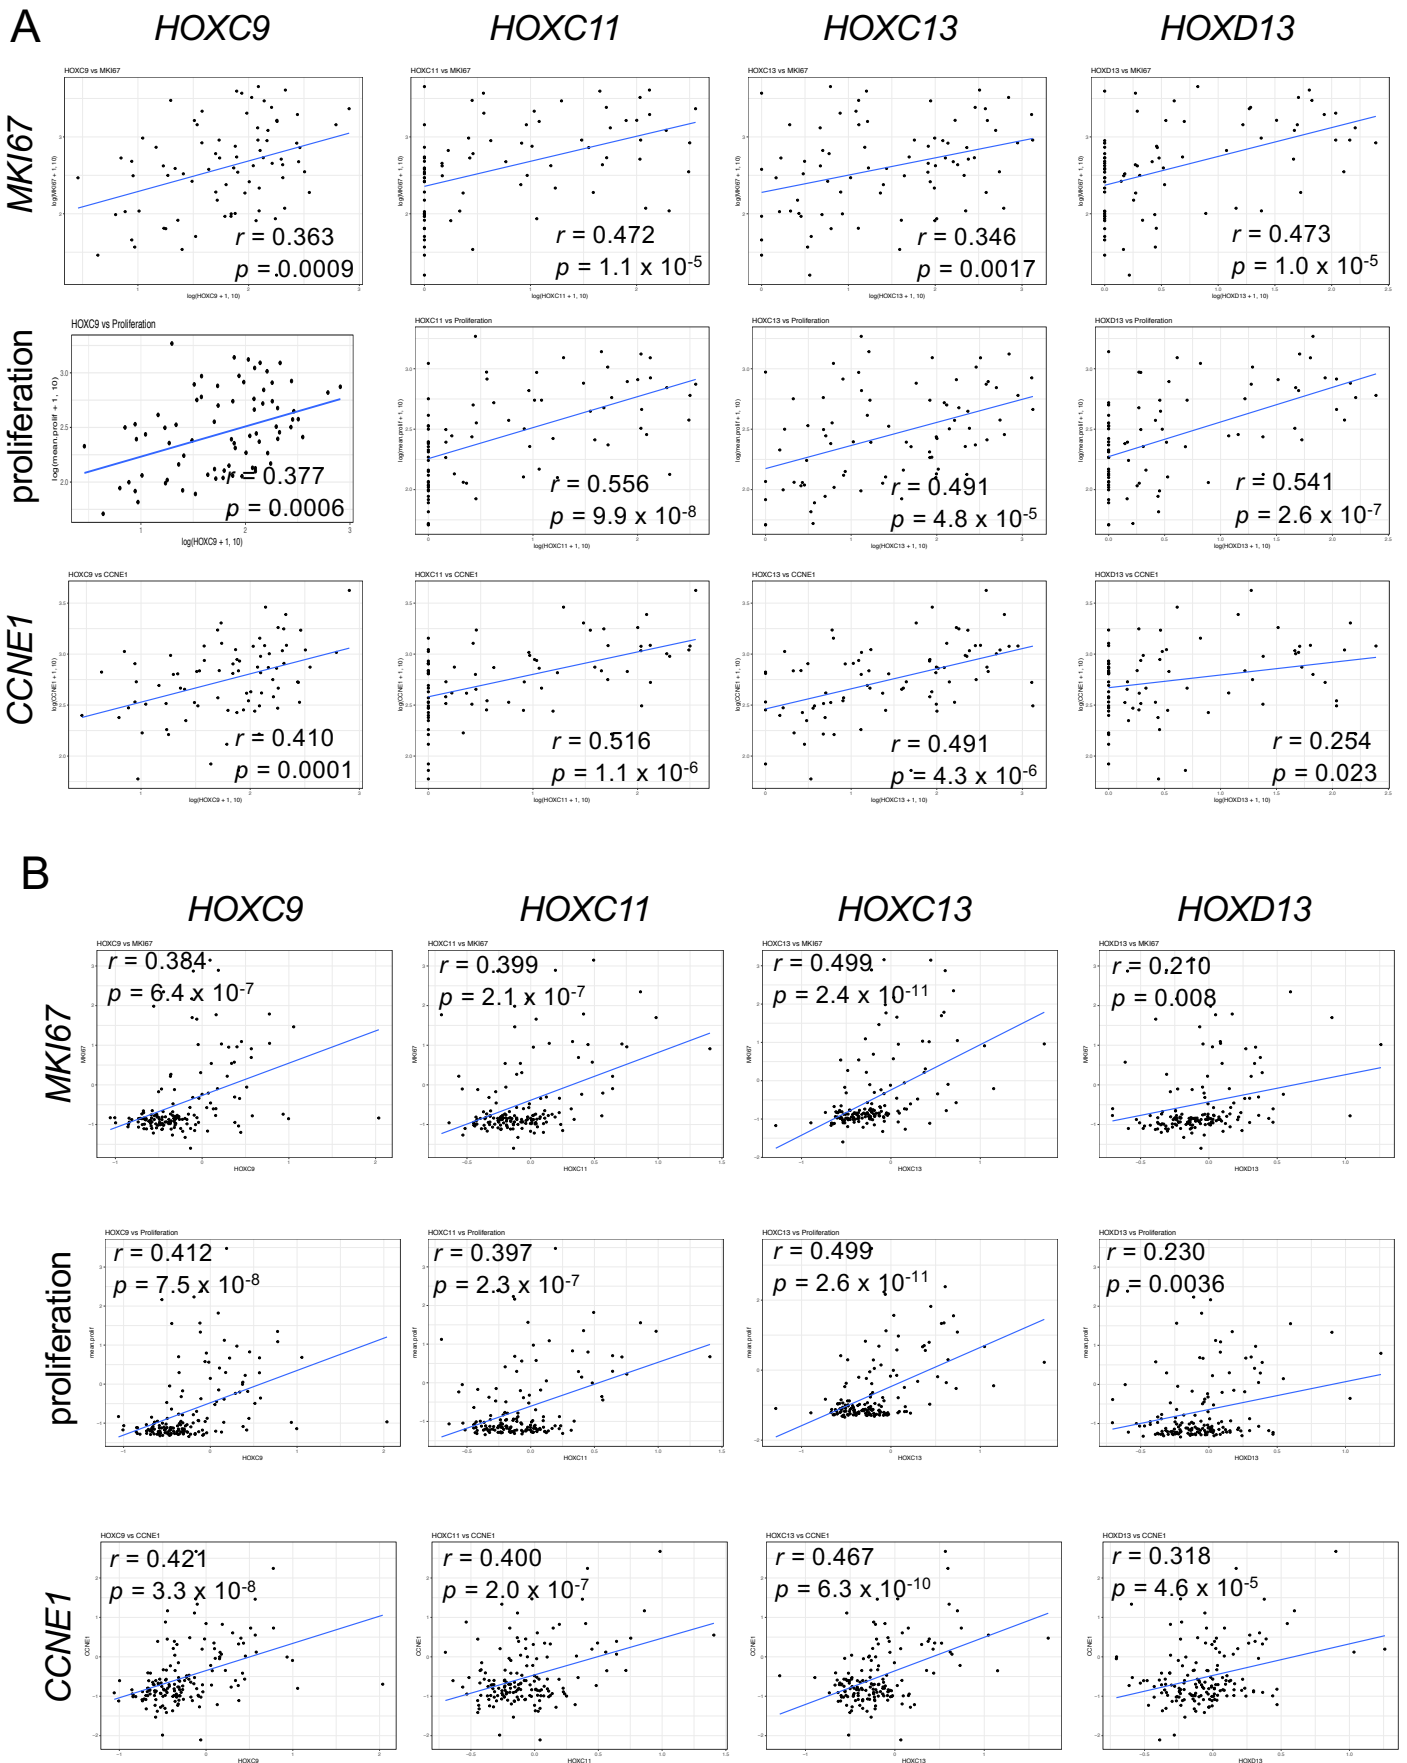

**Figure S5.** (A) TCGA cohort HOX gene correlations with *MKI67*, the proliferation gene signature and *CCNE1*. (B) Cochin cohort HOX gene correlations with *MKI67*, the proliferation gene signature and *CCNE1*.

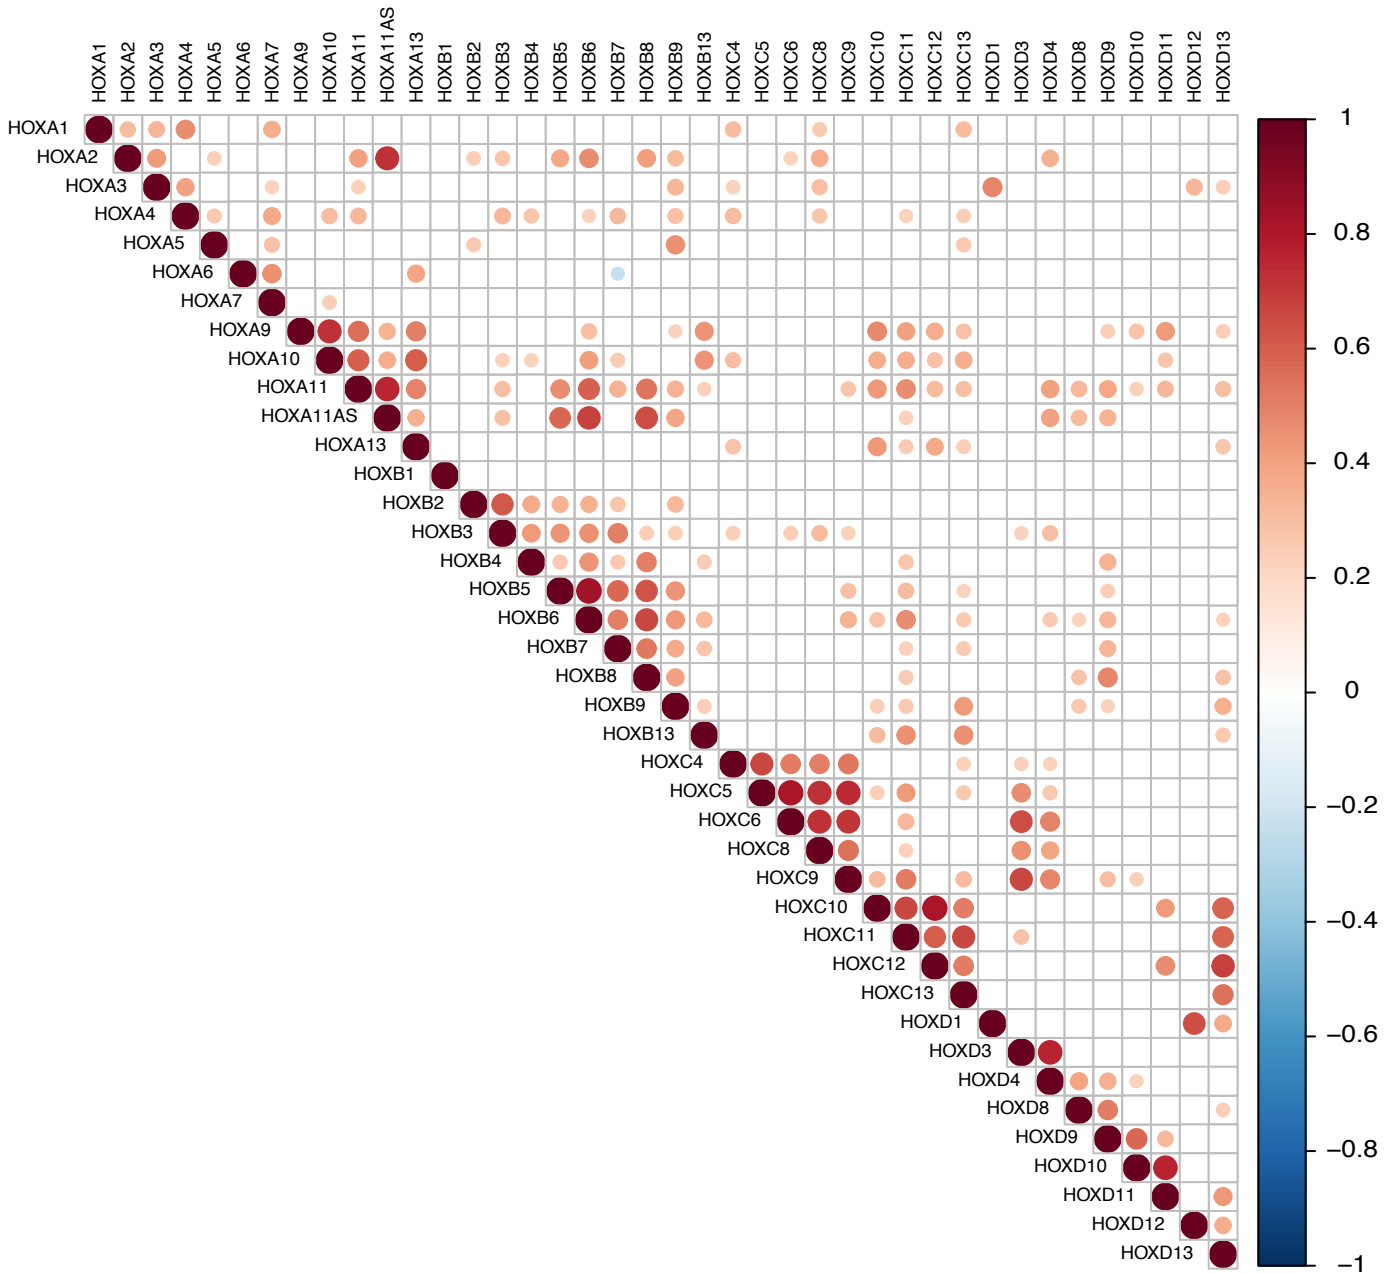

**Figure S6.** Correlogram of HOX gene expression correlation with the expression of other HOX genes in ACC TCGA patient samples. Colour scale is the correlation  $r$  value and spot size is the  $p$  value.



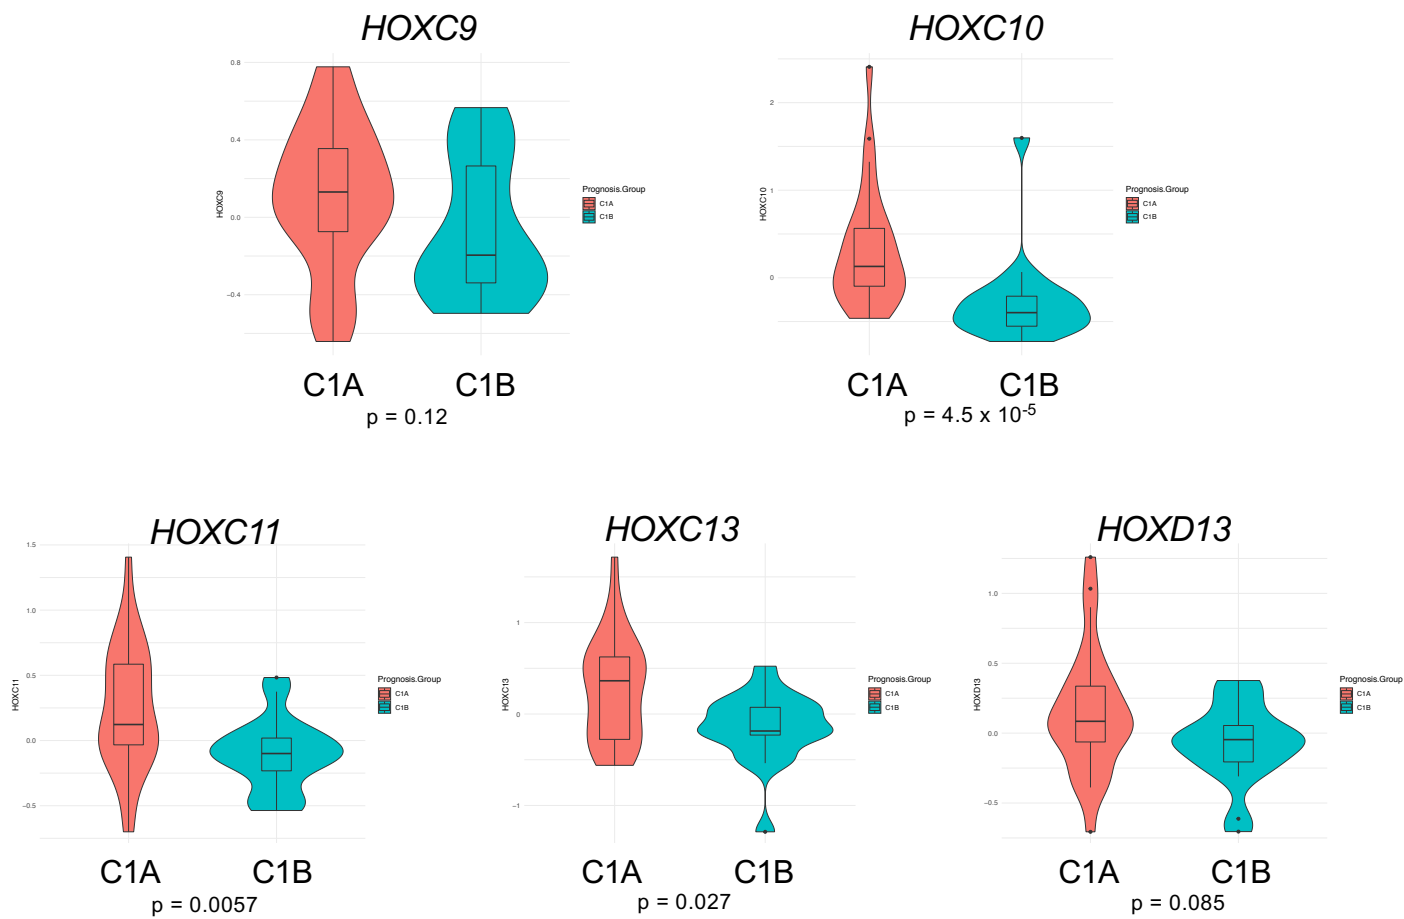

**Figure S7.** Cochin cohort HOX gene expression in C1A and C1B sub-types.

### TCGA cohort overall survival

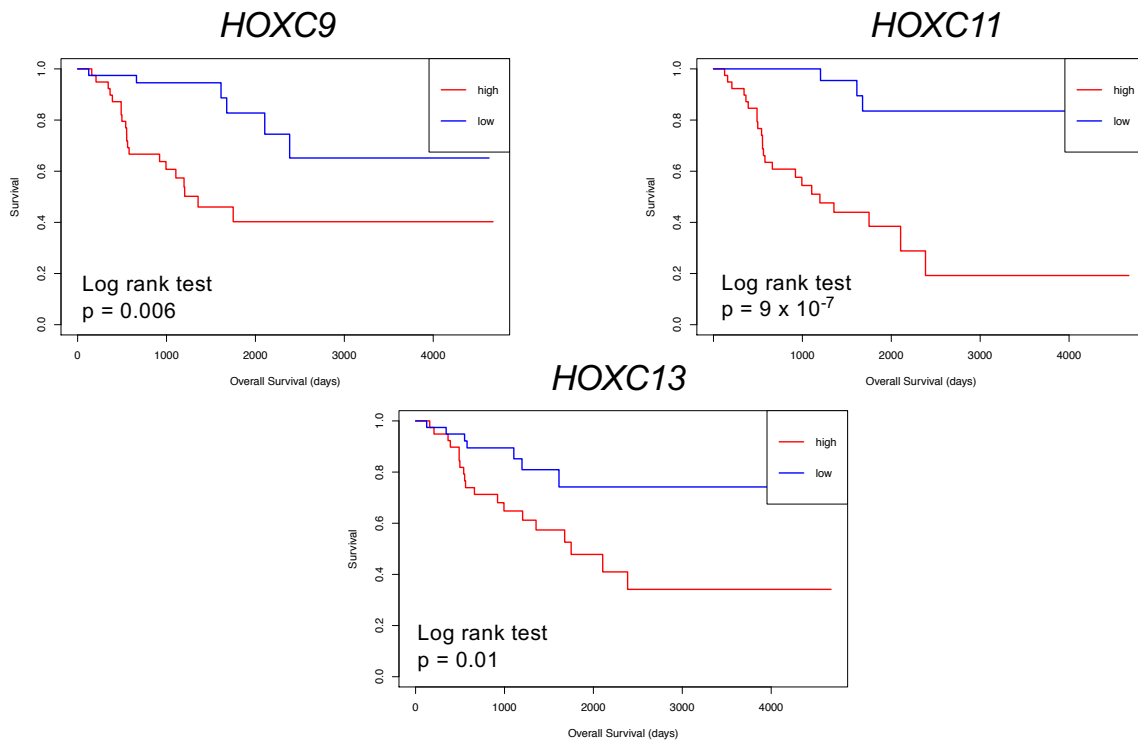

### TCGA cohort disease free survival

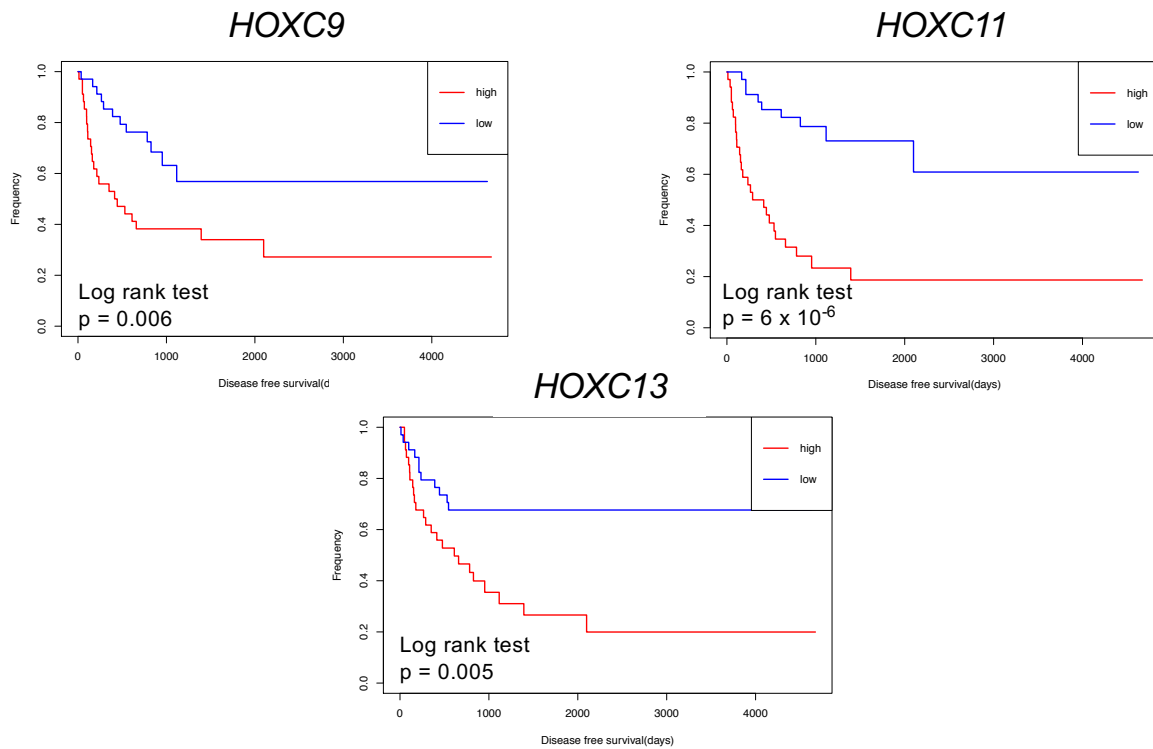

**Figure S8.** Kaplan Meier survival curves for ACC patients from the TCGA cohort that had either high or low *HOXC9*, *HOXC11* or *HOXC13* expression.

## Cochin cohort overall survival

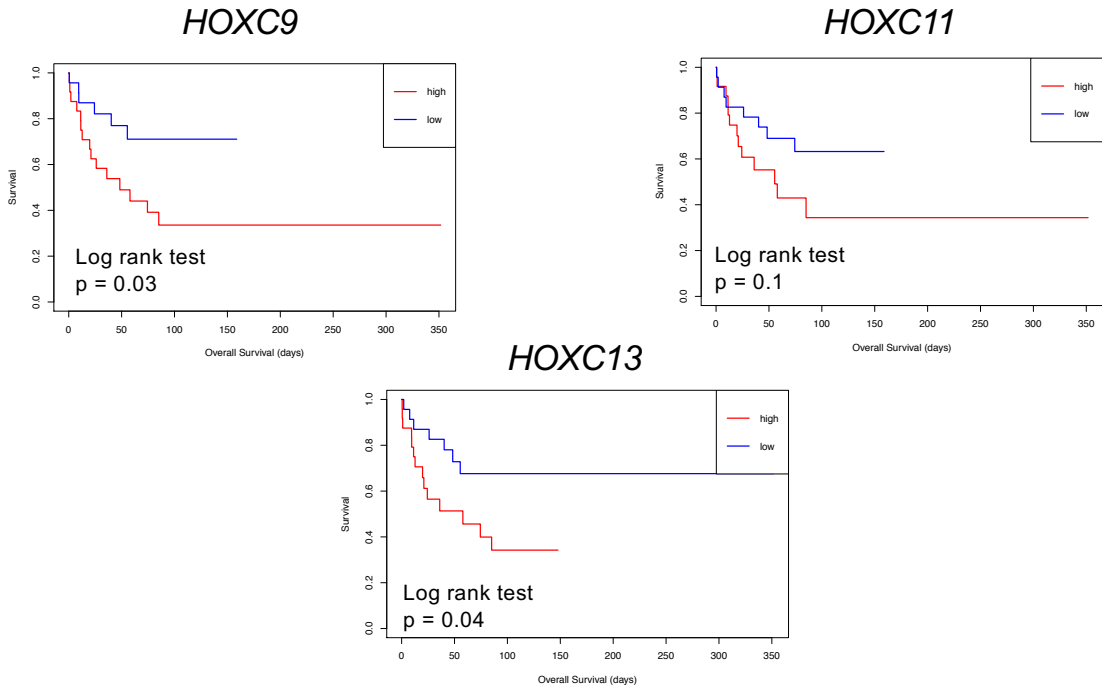

## Cochin cohort - disease free survival

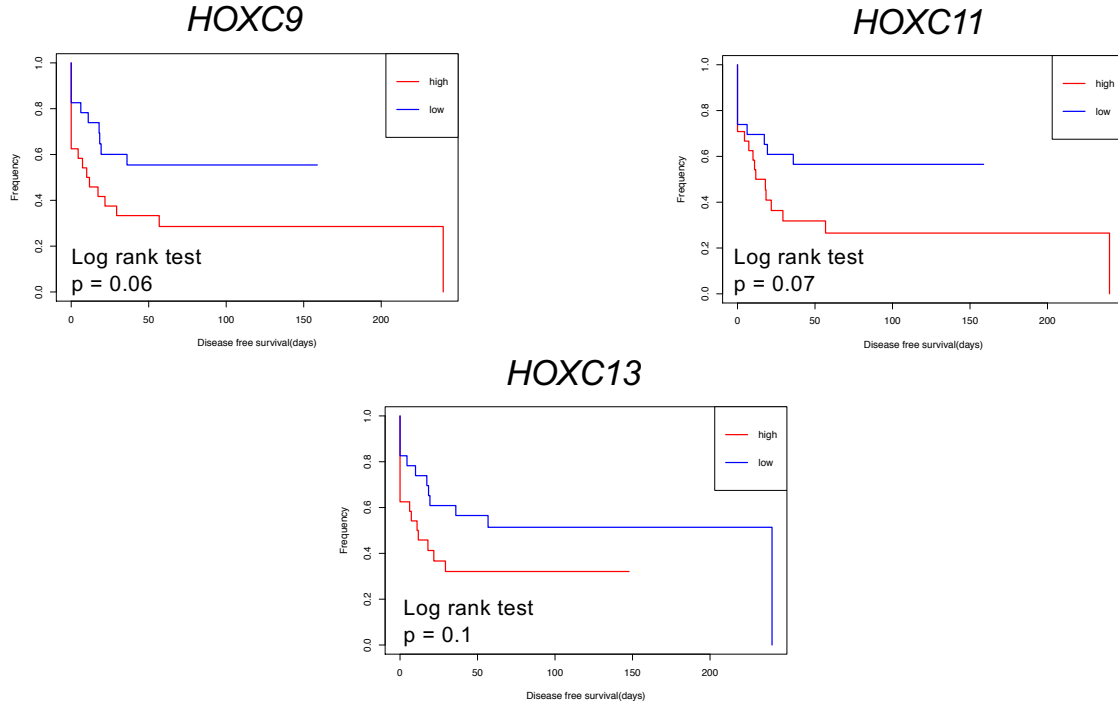

**Figure S9.** Kaplan Meier survival curves for ACC patients from the Cochin cohort that had either high or low *HOXC9*, *HOXC11* or *HOXC13* expression.

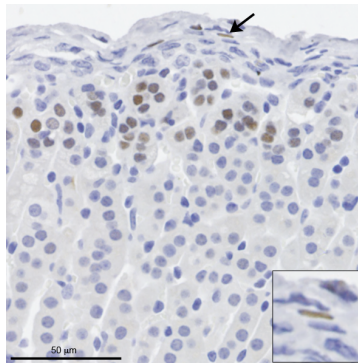

**Figure S10.** Fosb staining on a section of a 3-month-old male adrenal gland. Arrow indicates a positive cell in the capsule that is also shown at high magnification.

**Table S1. Genes used for the proliferation signature**

| Probe Set ID | Gene Symbol | Gene Name                                                               |
|--------------|-------------|-------------------------------------------------------------------------|
| 201291_s_at  | TOP2A       | Topoisomerase (DNA) II alpha 170kDa                                     |
| 201292_at    | TOP2A       | Topoisomerase (DNA) II alpha 170kDa                                     |
| 201890_at    | RRM2        | Ribonucleotide reductase M2                                             |
| 202095_s_at  | BIRC5       | Baculoviral IAP repeat-containing 5                                     |
| 202503_s_at  | KIAA0101    | KIAA0101                                                                |
| 202580_x_at  | FOXM1       | Forkhead box M1                                                         |
| 202589_at    | TYMS        | Thymidylate synthetase                                                  |
| 202705_at    | CCNB2       | Cyclin B2                                                               |
| 202870_s_at  | CDC20       | Cell division cycle 20 homolog (S. cerevisiae)                          |
| 202954_at    | UBE2C       | Ubiquitin-conjugating enzyme E2C                                        |
| 203213_at    | CDK1        | Cyclin-dependent kinase 1                                               |
| 203214_x_at  | CDK1        | Cyclin-dependent kinase 1                                               |
| 203362_s_at  | MAD2L1      | MAD2 mitotic arrest deficient-like 1 (yeast)                            |
| 203554_x_at  | PTTG1       | Pituitary tumor-transforming 1                                          |
| 203755_at    | BUB1B       | Budding uninhibited by benzimidazoles 1 homolog<br>beta (yeast)         |
| 203764_at    | DLGAP5      | Discs, large (Drosophila) homolog-associated protein<br>5               |
| 204026_s_at  | ZWINT       | ZW10 interactor                                                         |
| 204033_at    | TRIP13      | Thyroid hormone receptor interactor 13                                  |
| 204092_s_at  | AURKA       | Aurora kinase A                                                         |
| 208079_s_at  | AURKA       | Aurora kinase A                                                         |
| 204162_at    | NDC80       | NDC80 homolog, kinetochore complex component<br>(S. cerevisiae)         |
| 204170_s_at  | CKS2        | CDC28 protein kinase regulatory subunit 2                               |
| 204444_at    | KIF11       | Kinesin family member 11                                                |
| 204641_at    | NEK2        | NIMA (never in mitosis gene a)-related kinase 2                         |
| 204822_at    | TTK         | TTK protein kinase                                                      |
| 204825_at    | MELK        | Maternal embryonic leucine zipper kinase                                |
| 204962_s_at  | CENPA       | Centromere protein A                                                    |
| 205034_at    | CCNE2       | cyclin E2                                                               |
| 205046_at    | CENPE       | Centromere protein E, 312kDa                                            |
| 206102_at    | GINS1       | GINS complex subunit 1 (Psf1 homolog)                                   |
| 206364_at    | KIF14       | Kinesin family member 14                                                |
| 207828_s_at  | CENPF       | Centromere protein F, 350/400kDa (mitosin)                              |
| 209172_s_at  | CENPF       | Centromere protein F, 350/400kDa (mitosin)                              |
| 209408_at    | KIF2C       | Kinesin family member 2C                                                |
| 209642_at    | BUB1        | Budding uninhibited by benzimidazoles 1 homolog<br>(yeast)              |
| 209714_s_at  | CDKN3       | Cyclin-dependent kinase inhibitor 3                                     |
| 209773_s_at  | RRM2        | Ribonucleotide reductase M2                                             |
| 210052_s_at  | TPX2        | TPX2, microtubule-associated, homolog (Xenopus<br>laevis)               |
| 210559_s_at  | CDK1        | Cyclin-dependent kinase 1                                               |
| 212022_s_at  | MKI67       | Antigen identified by monoclonal antibody Ki-67                         |
| 212949_at    | NCAPH       | Non-SMC condensin I complex, subunit H                                  |
| 213226_at    | CCNA2       | Cyclin A2                                                               |
| 214710_s_at  | CCNB1       | Cyclin B1                                                               |
| 218009_s_at  | PRC1        | Protein regulator of cytokinesis 1                                      |
| 218039_at    | NUSAP1      | Nucleolar and spindle associated protein 1                              |
| 218355_at    | KIF4A       | Kinesin family member 4A                                                |
| 218542_at    | CEP55       | Centrosomal protein 55kDa                                               |
| 218585_s_at  | DTL         | Denticleless homolog (Drosophila)                                       |
| 218662_s_at  | NCAPG       | Non-SMC condensin I complex, subunit G                                  |
| 218663_at    | NCAPG       | Non-SMC condensin I complex, subunit G                                  |
| 218726_at    | HJURP       | Holliday junction recognition protein                                   |
| 218755_at    | KIF20A      | Kinesin family member 20A                                               |
| 218883_s_at  | MLF1IP      | MLF1 interacting protein                                                |
| 219148_at    | PBK         | PDZ binding kinase                                                      |
| 219306_at    | KIF15       | Kinesin family member 15                                                |
| 219918_s_at  | ASPM        | asp (abnormal spindle) homolog, microcephaly<br>associated (Drosophila) |
| 220651_s_at  | MCM10       | Minichromosome maintenance complex component<br>10                      |
| 221436_s_at  | CDCA3       | Cell division cycle associated 3                                        |
| 221520_s_at  | CDCA8       | Cell division cycle associated 8                                        |
| 222039_at    | KIF18B      | Kinesin family member 18B                                               |
| 222077_s_at  | RACGAP1     | Rac GTPase activating protein 1                                         |

**Table S2. Mouse adrenal tumours analysed by RNAseq**

| <b>Animal ID</b> | <b>Sex</b> | <b>Genotype</b> |
|------------------|------------|-----------------|
| 184208-Turq182   | Female     | ABC             |
| 183159-B200      | Female     | ABC             |
| B505             | Female     | ABC             |
| 207386           | Female     | ABC             |
| 153514           | Female     | ABC; Hoxb9      |
| 153516           | Female     | ABC; Hoxb9      |
| 189961-B532      | Female     | ABC; Hoxb9      |
| 191284           | Female     | ABC; Hoxb9      |
| 166836           | Male       | ABC             |
| 166838           | Male       | ABC             |
| 182098-Turq199   | Male       | ABC             |
| 169229           | Male       | ABC; Hoxb9      |
| 182083-Turq191   | Male       | ABC; Hoxb9      |
| 182086-Turq194   | Male       | ABC; Hoxb9      |

Table S3. Genes differentially expressed in ABC\_Hoxb9 Female vs ABC Female

| Gene          | ENSEMBL_Gene_ID      | baseMean    | log2FoldChange | fcsE        | stat         | pvalue      | padj        | Read count   |             |              |              |             |             |             |             |  |  |
|---------------|----------------------|-------------|----------------|-------------|--------------|-------------|-------------|--------------|-------------|--------------|--------------|-------------|-------------|-------------|-------------|--|--|
|               |                      |             |                |             |              |             |             | 184208_Turq1 | 183159_B200 | B505_Normall | 207386_Norm1 | 153514_Norm | 153516_Norm | 189961_B532 | 191284_Norm |  |  |
| Sic27a2       | ENSMUSG00000027359   | 21.9051591  | 4.191942937    | 1.148305906 | 3.650545482  | 0.000261684 | 0.085256787 | 0            | 1           | 2            | 5            | 14          | 20          | 130         | 2           |  |  |
| Prg4          | ENSMUSG00000006014   | 10.56221999 | 3.687436402    | 1.012912294 | 3.640430098  | 0.000272183 | 0.085256787 | 2            | 1           | 1            | 2            | 8           | 2           | 30          | 39          |  |  |
| Apo17c        | ENSMUSG00000004309   | 6.58620907  | 3.28113107     | 0.876188625 | 3.744777068  | 0.000180554 | 0.064025139 | 2            | 0           | 1            | 2            | 10          | 20          | 6           | 21          |  |  |
| Trim12a       | ENSMUSG00000006258   | 95.97699655 | 3.243870079    | 0.734084608 | 4.418932152  | 9.91898E-06 | 0.010965722 | 22           | 14          | 28           | 10           | 345         | 45          | 276         | 29          |  |  |
| Ptprq         | ENSMUSG000000035916  | 20.79260951 | 3.047391271    | 0.764611306 | 3.38554304   | 6.732E-05   | 0.03273491  | 1            | 12          | 2            | 4            | 25          | 47          | 13          | 63          |  |  |
| Foxl2         | ENSMUSG000000050397  | 18.98663136 | 3.015393916    | 0.803884277 | 3.751029847  | 0.00017611  | 0.064025139 | 1            | 8           | 0            | 8            | 32          | 55          | 15          | 33          |  |  |
| Tdh           | ENSMUSG000000052415  | 31.44739379 | 2.76969431     | 0.702768844 | 3.941117105  | 8.1103E-05  | 0.035360644 | 4            | 15          | 6            | 8            | 110         | 15          | 71          | 23          |  |  |
| Cfp5a5        | ENSMUSG00000020014   | 944.4184571 | 2.611899487    | 0.462859836 | 5.642959889  | 1.67151E-08 | 5.23574E-05 | 220          | 226         | 389          | 226          | 2849        | 1038        | 2004        | 602         |  |  |
| Nr6a1         | ENSMUSG000000063972  | 592.0603564 | 2.59182928     | 0.414526232 | 6.252509685  | 4.03909E-10 | 2.53035E-06 | 207          | 228         | 151          | 89           | 1053        | 1380        | 432         | 1196        |  |  |
| Bdnf          | ENSMUSG000000048482  | 16.68834789 | 2.568158658    | 0.627518535 | 4.092562235  | 4.26633E-05 | 0.025657524 | 2            | 5           | 6            | 5            | 35          | 25          | 9           | 39          |  |  |
| Egfm1         | ENSMUSG000000036000  | 12.77949348 | 2.458183988    | 0.532236783 | 4.618590947  | 3.86355E-06 | 0.005585499 | 6            | 3           | 4            | 3            | 18          | 28          | 17          | 24          |  |  |
| Dnase1l3      | ENSMUSG00000025279   | 36.32121221 | 1.873191998    | 0.314700492 | 5.952707473  | 2.63742E-09 | 1.23919E-05 | 17           | 16          | 14           | 16           | 66          | 65          | 50          | 47          |  |  |
| Pnc5l         | ENSMUSG000000027615  | 141.7561673 | 1.788716732    | 0.412409503 | 4.33724523   | 1.44287E-05 | 0.012912968 | 19           | 31          | 51           | 102          | 233         | 185         | 134         | 328         |  |  |
| Srfa5         | ENSMUSG000000039728  | 184.6835041 | 1.68560986     | 0.358915349 | 4.707408006  | 2.50886E-06 | 0.00471516  | 78           | 79          | 122          | 71           | 193         | 477         | 240         | 219         |  |  |
| Cd3e          | ENSMUSG000000032093  | 12.68089399 | 1.679113556    | 0.463407924 | 3.62340277   | 0.000290753 | 0.089580378 | 7            | 7           | 5            | 5            | 16          | 23          | 20          | 18          |  |  |
| Dsp           | ENSMUSG000000054889  | 1085.754275 | 1.635048749    | 0.254713327 | 6.419172365  | 1.37017E-10 | 2.4443E-06  | 627          | 527         | 439          | 523          | 1190        | 2168        | 1323        | 1890        |  |  |
| Serpina3f     | ENSMUSG000000066397  | 16.46395617 | 1.632374878    | 0.430623559 | 3.790723578  | 0.000150209 | 0.060064445 | 6            | 9           | 9            | 7            | 20          | 23          | 23          | 34          |  |  |
| Star9         | ENSMUSG000000033705  | 536.9815802 | 1.469829889    | 0.316412575 | 4.64529543   | 3.3959E-06  | 0.005385956 | 454          | 211         | 268          | 205          | 808         | 1024        | 689         | 636         |  |  |
| Arlgap20      | ENSMUSG000000053199  | 79.52185178 | 1.392139913    | 0.317315969 | 4.38725592   | 1.149E-05   | 0.011647653 | 37           | 30          | 64           | 43           | 114         | 145         | 84          | 119         |  |  |
| Zfp165        | ENSMUSG000000066687  | 112.1571643 | 1.349854538    | 0.283971659 | 4.756272746  | 2.00747E-06 | 0.004192047 | 72           | 60          | 73           | 48           | 158         | 225         | 140         | 123         |  |  |
| Nr1c5         | ENSMUSG000000074151  | 82.73442601 | 1.280321807    | 0.29981152  | 4.270422319  | 0.15103E-05 | 0.015942474 | 35           | 31          | 41           | 45           | 110         | 112         | 133         | 115         |  |  |
| Pdgrfa        | ENSMUSG000000029231  | 859.0140792 | 1.274687466    | 0.304411773 | 4.187379002  | 2.82196E-05 | 0.019642819 | 526          | 705         | 310          | 470          | 1159        | 1286        | 856         | 1559        |  |  |
| Atf10d        | ENSMUSG000000046808  | 80.59708051 | 1.258358531    | 0.344924793 | 3.648211314  | 0.000264072 | 0.085256787 | 67           | 27          | 32           | 63           | 129         | 101         | 99          | 126         |  |  |
| Adam2         | ENSMUSG000000054555  | 58.85155406 | 1.193994304    | 0.331918089 | 3.597255897  | 0.000321592 | 0.094437519 | 29           | 38          | 28           | 49           | 54          | 79          | 112         | 83          |  |  |
| Cxcl9         | ENSMUSG000000029417  | 56.13421237 | 1.183284704    | 0.314522196 | 3.762165975  | 0.000168448 | 0.064025139 | 29           | 57          | 26           | 27           | 74          | 71          | 82          | 83          |  |  |
| Serpina3g     | ENSMUSG000000041481  | 85.85680109 | 1.174701512    | 0.283482245 | 4.143827462  | 3.41557E-05 | 0.02251222  | 38           | 47          | 49           | 77           | 118         | 140         | 99          | 119         |  |  |
| Gm4070        | ENSMUSG000000078606  | 122.1933688 | 1.142426179    | 0.283971659 | 4.756272746  | 2.00747E-06 | 0.00360297  | 157          | 94          | 109          | 93           | 299         | 65          | 218         | 228         |  |  |
| Cars8         | ENSMUSG000000027035  | 80.36201981 | 1.109977474    | 0.300500927 | 3.005075237  | 0.000209065 | 0.076903922 | 53           | 56          | 55           | 40           | 85          | 114         | 82          | 158         |  |  |
| Filip1        | ENSMUSG000000034898  | 1076.60538  | 1.110708143    | 0.254310664 | 4.353263895  | 1.34126E-05 | 0.012603776 | 538          | 668         | 764          | 760          | 1005        | 1363        | 1548        | 1966        |  |  |
| Gvin1         | ENSMUSG000000045868  | 187.1609099 | 1.069610302    | 0.262522575 | 4.074355516  | 4.61419E-05 | 0.02657524  | 166          | 108         | 103          | 106          | 333         | 211         | 251         | 220         |  |  |
| Nr5a1         | ENSMUSG000000026751  | 23101.31731 | 1.046153797    | 0.257144039 | 4.06835717   | 4.73458E-05 | 0.025657524 | 12249        | 15538       | 14523        | 17988        | 33572       | 39728       | 19701       | 31512       |  |  |
| Pgm2l1        | ENSMUSG000000039787  | 128.3059617 | 1.044079497    | 0.264608681 | 3.79550972   | 7.95508E-05 | 0.035360644 | 86           | 75          | 108          | 66           | 148         | 192         | 215         | 136         |  |  |
| Ith5          | ENSMUSG000000025780  | 1828.633184 | 1.034868495    | 0.25403474  | 4.073728243  | 4.62665E-05 | 0.025657524 | 1200         | 1353        | 1399         | 846          | 2310        | 2314        | 1905        | 3301        |  |  |
| Tenn4         | ENSMUSG000000048078  | 1271.834504 | 1.017866294    | 0.26614314  | 3.822628288  | 0.000132057 | 0.053945621 | 1134         | 964         | 690          | 577          | 2102        | 1482        | 1684        | 1542        |  |  |
| Cdon          | ENSMUSG000000038119  | 189.7879037 | 0.915018221    | 0.19708776  | 4.642694802  | 3.43894E-06 | 0.005385956 | 125          | 106         | 142          | 152          | 236         | 221         | 251         | 285         |  |  |
| Vcam1         | ENSMUSG000000027962  | 686.1843965 | 0.901959428    | 0.235112037 | 3.836292653  | 0.000124904 | 0.052165345 | 458          | 374         | 509          | 572          | 876         | 1183        | 709         | 808         |  |  |
| Finc          | ENSMUSG000000008699  | 166.2070425 | 0.901711554    | 0.240700361 | 3.746199432  | 0.000179534 | 0.064025139 | 138          | 106         | 97           | 123          | 193         | 174         | 216         | 283         |  |  |
| Tnfrsf21      | ENSMUSG000000023915  | 129.3081305 | 0.898144543    | 0.23955356  | 3.749243145  | 0.000177369 | 0.064025139 | 106          | 68          | 75           | 112          | 193         | 164         | 148         | 169         |  |  |
| Tmem181b-ps   | ENSMUSG000000096780  | 285.7006728 | 0.895979863    | 0.211719068 | 4.231928054  | 2.31697E-05 | 0.016748095 | 179          | 190         | 246          | 183          | 385         | 442         | 294         | 366         |  |  |
| Dock8         | ENSMUSG0000000052085 | 264.9339641 | 0.831284386    | 0.209374408 | 3.703324719  | 1.71747E-05 | 0.033723363 | 244          | 168         | 157          | 193          | 348         | 309         | 387         | 314         |  |  |
| Tgfb3         | ENSMUSG000000029287  | 3527.69397  | 0.82298846     | 0.202464791 | 4.064849213  | 4.80635E-05 | 0.025657524 | 2766         | 1822        | 3052         | 2550         | 4028        | 4489        | 4715        | 4800        |  |  |
| Kar1k1        | ENSMUSG000000032702  | 394.554745  | 0.797932126    | 0.184619767 | 4.322035714  | 5.14595E-05 | 0.01306728  | 250          | 296         | 259          | 349          | 531         | 488         | 531         | 551         |  |  |
| Sfn5          | ENSMUSG000000033720  | 228.116906  | 0.77478386     | 0.213565554 | 3.640467156  | 0.000272144 | 0.085256787 | 191          | 125         | 188          | 167          | 245         | 284         | 340         | 286         |  |  |
| Msr1          | ENSMUSG000000025044  | 78.52080089 | 0.743620497    | 0.207709181 | 3.580104121  | 0.000343457 | 0.097860037 | 63           | 54          | 64           | 53           | 108         | 97          | 95          | 94          |  |  |
| Klf21a        | ENSMUSG000000026229  | 606.8049681 | 0.656018112    | 0.164687737 | 3.983405962  | 6.79346E-05 | 0.03273491  | 468          | 565         | 440          | 412          | 741         | 751         | 805         | 671         |  |  |
| Klhl12        | ENSMUSG000000024659  | 805.6268982 | 0.597117643    | 0.120380972 | 4.960232762  | 7.04088E-07 | 0.001654078 | 674          | 601         | 644          | 646          | 988         | 1029        | 906         | 957         |  |  |
| Cyrr1         | ENSMUSG000000041134  | 583.3518596 | 0.587586018    | 0.16059243  | 3.658864967  | 0.000253335 | 0.085020959 | 420          | 384         | 505          | 454          | 676         | 756         | 659         | 713         |  |  |
| Thns2         | ENSMUSG000000054474  | 490.4863057 | -0.775627118   | 0.206034003 | -3.76458795  | 0.000166843 | 0.064025139 | 595          | 785         | 635          | 562          | 415         | 329         | 372         | 330         |  |  |
| 1700040L02Rk  | ENSMUSG000000019945  | 141.0419481 | -0.895256479   | 0.204316839 | -4.38170677  | 1.17793E-05 | 0.011647653 | 185          | 194         | 196          | 160          | 82          | 99          | 92          | 121         |  |  |
| Imc           | ENSMUSG000000048782  | 124.1928239 | -0.024029528   | 0.18460156  | -3.598748818 | 0.000319752 | 0.094437519 | 198          | 115         | 211          | 141          | 89          | 60          | 94          | 87          |  |  |
| Skap1         | ENSMUSG000000051196  | 529.0237922 | -1.045117196   | 0.252283536 | -1.142629408 | 3.43347E-05 | 0.02251222  | 660          | 931         | 574          | 686          | 455         | 320         | 348         | 258         |  |  |
| Sbspon        | ENSMUSG000000032719  | 899.2796667 | -1.079379755   | 0.254205857 | -2.42608531  | 2.17538E-05 | 0.016353624 | 1544         | 1070        | 1202         | 1066         | 568         | 495         | 807         | 441         |  |  |
| Gstm7         | ENSMUSG000000040035  | 1138.044699 | -1.170350479   | 0.326918171 | -3.579949305 | 0.000343661 | 0.097860037 | 964          | 2486        | 1078         | 1776         | 767         | 630         | 765         | 639         |  |  |
| RP23-82113.8  | ENSMUSG0000000107432 | 69.66141325 | -1.231228805   | 0.275430358 | -4.470200064 | 7.81465E-06 | 0.009179279 | 68           | 114         | 94           | 115          | 42          | 35          | 49          | 40          |  |  |
| Tspan11       | ENSMUSG000000030351  | 844.6849803 | -1.411743131   | 0.315773244 | -4.470749682 | 7.79459E-06 | 0.009179279 | 1402         | 1757        | 892          | 862          | 353         | 447         | 406         | 639         |  |  |
| Hist1h2ad     | ENSMUSG000000071478  | 43.66655185 | -1.605926072   | 0.407224753 | -3.943586587 | 8.0272E-05  | 0.035360644 | 40           | 107         | 41           | 75           | 24          | 19          | 23          | 20          |  |  |
| Lsr           | ENSMUSG0000000001247 | 403.2309522 | -1.696471991   | 0.263892687 | -6.32087737  | 2.60115E-10 | 2.4443E-06  | 890          | 633         | 502          | 441          | 206         | 209         | 181         | 165         |  |  |
| Rimkb         | ENSMUSG000000040649  | 60.58136567 | -1.829022286   | 0.447456305 | -4.087599762 | 4.35859E-05 | 0.025657524 | 139          | 64          | 109          | 66           | 41          | 12          | 34          | 20          |  |  |
| Lyd6          | ENSMUSG000000034634  | 5414.062031 | -2.352429977   | 0.55369072  | -4.246500561 | 2.17135E-05 | 0.016353624 | 3055         | 13550       | 12918        | 6696         | 1161        | 1244        | 3737        | 951         |  |  |
| 4930481A15Rik | ENSMUSG000000086938  | 150.0490934 | -2.377103166   | 0.58829502  | -4.040665117 | 5.32998E-05 | 0.027073429 | 89           | 618         | 163          | 136          | 37          | 31          | 58          | 68          |  |  |
| Gulo          | ENSMUSG000000034450  | 45.19409874 | -2.455849138   | 0.482481479 | -5.090038159 | 3.57991E-07 | 0.00061156  | 76           | 121         | 74           | 35           | 18          | 21          | 10          | 8           |  |  |
| Guca1a        | ENSMUSG000000023982  | 124.8593841 | -2.493240255   | 0.678372319 | -3.675327227 | 0.000237545 | 0.081171201 | 49           | 583         | 78           | 138          | 36          | 27          | 49          | 39          |  |  |
| Lyk6          | ENSMUSG000000044678  | 438.3079278 | -2.58237902    | 0.451272697 | -5.722435766 | 1.05008E-08 | 3.94702E-05 | 976          | 294         | 551          | 1182         | 175         | 71          | 121         | 135         |  |  |
| Magp15        | ENSMUSG000000063704  |             |                |             |              |             |             |              |             |              |              |             |             |             |             |  |  |

Table S4. Genes differentially expressed ABC\_HoxB9 Male vs ABC Male

| Gene         | ENSEMBL_Gene_ID     | baseMean     | log2FoldChange | lfcSE       | stat         | pvalue       | padj        | Read count  |             |              |              |              |              |              |              |
|--------------|---------------------|--------------|----------------|-------------|--------------|--------------|-------------|-------------|-------------|--------------|--------------|--------------|--------------|--------------|--------------|
|              |                     |              |                |             |              |              |             | 166836_Norm | 166838_Norm | 182098_Turq1 | 182098_Turq2 | 182098_Turq3 | 182098_Turq4 | 182098_Turq5 | 182098_Turq6 |
| Nrb1a        | ENSMUSG00000003972  | 811.1701312  | 3.641534655    | 0.245763457 | 14.817234002 | 1.13357E-49  | 2.06993E-45 | 162         | 107         | 92           | 1392         | 1573         | 1541         |              |              |
| Nrb1b        | ENSMUSG00000003973  | 10.624151573 | 0.162415157    | 0.001624157 | 10.624151573 | 1.13357E-49  | 2.06993E-45 | 269         | 173         | 75           | 345          | 205          | 205          |              |              |
| Rbm24        | ENSMUSG000000038132 | 5273.455917  | 1.77354782     | 0.167771123 | 10.57123433  | 4.05127E-26  | 2.4652E-22  | 2629        | 2637        | 4253         | 9027         | 8255         | 7198         |              |              |
| Nr5a1        | ENSMUSG000000026751 | 27438.90468  | 1.928280233    | 0.192796792 | 10.00161993  | 1.49924E-23  | 6.84217E-20 | 9584        | 11915       | 12757        | 48019        | 37251        | 45108        |              |              |
| Mg2          | ENSMUSG000000074604 | 105.3306037  | 4.490598127    | 0.513797543 | 8.740041792  | 2.3308E-18   | 8.50975E-10 | 8           | 12          | 7            | 322          | 102          | 181          |              |              |
| Fos          | ENSMUSG000000021250 | 384.6775037  | 3.007200438    | 0.350590691 | 8.688726353  | 1.04636E-17  | 1.38355E-14 | 86          | 87          | 83           | 482          | 495          | 1075         |              |              |
| Pagr5        | ENSMUSG000000032278 | 185.324288   | -2.309866975   | 0.270957864 | 8.524819832  | 1.53408E-17  | 1.99127E-14 | 269         | 340         | 317          | 58           | 47           | 82           |              |              |
| Trib3        | ENSMUSG000000035154 | 176.4274023  | 1.516125313    | 0.143081098 | 8.40081098   | 4.4203E-17   | 1.01351E-13 | 379         | 428         | 443          | 23           | 28           | 28           |              |              |
| Frzb         | ENSMUSG000000027004 | 836.0153116  | 2.038833721    | 0.251620439 | 8.103394107  | 5.34467E-16  | 1.08408E-12 | 440         | 277         | 265          | 1445         | 1175         | 1415         |              |              |
| Actr1b       | ENSMUSG000000054988 | 1536.290434  | 1.49896675     | 0.191315668 | 7.835044379  | 4.68677E-15  | 8.5557E-12  | 814         | 904         | 691          | 2611         | 2128         | 2070         |              |              |
| Kcnj2        | ENSMUSG000000041695 | 487.6945518  | 1.447861269    | 0.190014778 | 7.619729798  | 2.54207E-14  | 4.21869E-11 | 239         | 279         | 267          | 692          | 629          | 820          |              |              |
| Fam19a4      | ENSMUSG000000046500 | 150.052925   | 2.16280513     | 0.293579078 | 7.367027452  | 1.74475E-13  | 2.65311E-10 | 43          | 75          | 46           | 280          | 205          | 251          |              |              |
| Ctsp9        | ENSMUSG000000040473 | 339.1089167  | 1.286672976    | 0.174905264 | 7.356399975  | 1.88937E-13  | 2.65311E-10 | 196         | 197         | 199          | 455          | 454          | 533          |              |              |
| Atp12b       | ENSMUSG000000041329 | 4023.080709  | 1.153090881    | 0.157907027 | 7.302240516  | 2.82804E-13  | 3.65757E-10 | 5416        | 5324        | 5949         | 2329         | 2354         | 2822         |              |              |
| Fosb         | ENSMUSG000000030545 | 159.7474421  | 2.972023973    | 0.413977847 | 7.179186021  | 7.01277E-13  | 8.15558E-10 | 35          | 58          | 15           | 338          | 217          | 237          |              |              |
| Sbpson       | ENSMUSG000000032719 | 1233.201099  | -6.31661149    | 0.227359428 | -7.176571316 | 7.14841E-13  | 8.15558E-10 | 1867        | 1503        | 2224         | 690          | 619          | 496          |              |              |
| Mthfd11      | ENSMUSG000000040675 | 394.8709454  | 1.756469142    | 0.246346008 | 7.130089728  | 1.00304E-12  | 1.07708E-09 | 130         | 204         | 174          | 692          | 552          | 584          |              |              |
| Pgm5         | ENSMUSG000000041731 | 2289.168586  | -0.238119805   | 0.291066692 | -7.002236892 | 2.51908E-12  | 2.5476E-09  | 4090        | 4694        | 2262         | 837          | 839          | 1018         |              |              |
| Dusp5        | ENSMUSG000000034765 | 147.9975296  | 1.67393789     | 0.208199793 | 6.906518816  | 4.96691E-12  | 4.7716E-09  | 75          | 86          | 79           | 229          | 207          | 213          |              |              |
| Hpc4         | ENSMUSG000000046093 | 734.9315465  | 2.224448287    | 0.333777622 | 6.664462024  | 2.65637E-11  | 2.30914E-08 | 126         | 161         | 68           | 565          | 653          | 437          |              |              |
| Wnt2         | ENSMUSG00000010797  | 38.84562318  | -5.88946637    | 0.546114877 | -6.571779658 | 4.97174E-11  | 4.03224E-08 | 179         | 169         | 62           | 7            | 8            | 8            |              |              |
| Fam19a9      | ENSMUSG000000041817 | 25.71259866  | 3.85457296     | 0.586821405 | 6.588562307  | 5.08034E-11  | 4.03224E-08 | 4           | 3           | 3            | 46           | 58           | 41           |              |              |
| Khd7a        | ENSMUSG000000078234 | 691.3638177  | -2.27441209    | 0.347327557 | -6.548317766 | 5.81888E-11  | 4.42599E-08 | 1369        | 1374        | 695          | 267          | 290          | 153          |              |              |
| Slt1         | ENSMUSG000000025020 | 676.9815123  | -1.647007297   | 0.252744036 | -6.502866714 | 7.88036E-11  | 5.75424E-08 | 1207        | 1047        | 825          | 421          | 278          | 284          |              |              |
| Egr1         | ENSMUSG000000029434 | 1195.437979  | 1.665113235    | 0.160512211 | 6.384183175  | 7.20917E-10  | 1.20829E-07 | 590         | 535         | 529          | 1536         | 1438         | 205          |              |              |
| Cpb1         | ENSMUSG000000011463 | 1154.039819  | 1.114970515    | 0.175539376 | 6.351682629  | 2.17153E-09  | 1.43992E-07 | 816         | 727         | 643          | 1749         | 1516         | 1473         |              |              |
| 181004115Rik | ENSMUSG000000062760 | 73.96064017  | -3.52228182    | 0.528672156 | -6.340844972 | 2.28508E-09  | 1.48979E-07 | 245         | 85          | 75           | 13           | 14           | 13           |              |              |
| Cela1        | ENSMUSG000000023031 | 300.3591209  | 1.320252192    | 0.208989162 | 6.317323724  | 2.66132E-10  | 1.67525E-07 | 172         | 141         | 203          | 397          | 447          | 443          |              |              |
| Dkk2         | ENSMUSG000000028031 | 269.3411136  | -1.206639835   | 0.191678566 | -6.295121349 | 3.07715E-09  | 1.86907E-07 | 363         | 362         | 403          | 145          | 159          | 104          |              |              |
| Lrn7a        | ENSMUSG000000019906 | 1025.814724  | 1.803173034    | 0.287815956 | 6.26502108   | 3.72775E-09  | 1.29516E-07 | 488         | 488         | 395          | 2146         | 1596         | 1842         |              |              |
| Necap4       | ENSMUSG00000003031  | 80.819715643 | -3.920260612   | 0.308747162 | -6.248490183 | 4.144349E-09 | 2.30914E-07 | 230         | 200         | 85           | 32           | 19           | 26           |              |              |
| Tspan7       | ENSMUSG000000058254 | 1035.205687  | -1.107060862   | 0.178791325 | -6.191915966 | 5.94372E-09  | 3.82796E-07 | 1448        | 1259        | 1536         | 649          | 583          | 738          |              |              |
| Plin1        | ENSMUSG000000030546 | 388.832783   | -2.272761886   | 0.373505401 | -6.08495053  | 1.16257E-09  | 6.25649E-07 | 3482        | 2143        | 1279         | 343          | 589          | 497          |              |              |
| Cspg5        | ENSMUSG000000032482 | 1383.626308  | 1.15906702     | 0.192840094 | 6.010475815  | 1.84898E-09  | 9.64801E-07 | 896         | 792         | 879          | 1540         | 2101         | 2083         |              |              |
| Mid1         | ENSMUSG000000035299 | 79.4443562   | 1.097425918    | 0.184206721 | 5.957578061  | 2.56003E-09  | 1.29815E-06 | 446         | 567         | 515          | 1228         | 1000         | 1000         |              |              |
| Tfmbp8       | ENSMUSG000000022120 | 376.9331839  | 1.56346739     | 0.254791142 | 5.900783586  | 3.61779E-09  | 1.78494E-06 | 165         | 209         | 216          | 77           | 442          | 513          |              |              |
| Hsc4         | ENSMUSG00000001280  | 154.2430412  | -1.267053492   | 0.217935164 | -5.813425294 | 1.91707E-09  | 2.93896E-06 | 124         | 80          | 65           | 200          | 85           | 96           |              |              |
| Gdf15        | ENSMUSG000000038508 | 69.08074119  | -4.242813257   | 0.420863927 | -5.807405355 | 6.34314E-09  | 2.96908E-06 | 129         | 159         | 63           | 23           | 23           | 23           |              |              |
| Sic29a4      | ENSMUSG000000050822 | 198.1680778  | -1.206592712   | 0.208074283 | -5.798855554 | 6.6769E-09   | 3.04717E-06 | 291         | 239         | 299          | 109          | 125          | 125          |              |              |
| Cox6a2       | ENSMUSG000000030785 | 38.77786332  | -3.04112475    | 0.576884298 | -5.791952121 | 6.9573E-09   | 3.09769E-06 | 98          | 107         | 35           | 10           | 7            | 4            |              |              |
| Penk         | ENSMUSG000000045573 | 135.0352103  | -1.97702023    | 0.261427113 | -5.767198391 | 8.60002E-09  | 5.30323E-06 | 229         | 151         | 202          | 76           | 66           | 72           |              |              |
| Mafk1        | ENSMUSG000000041205 | 49.4026841   | -1.967603981   | 0.242124283 | -5.751138809 | 8.60447E-09  | 7.63208E-06 | 17          | 23          | 17           | 89           | 85           | 64           |              |              |
| Ame5         | ENSMUSG00000007712  | 937.620151   | -1.243399416   | 0.219375164 | -5.736476423 | 8.66656E-09  | 3.0108E-06  | 1223        | 11209       | 14913        | 4424         | 654          | 5309         |              |              |
| Knk2         | ENSMUSG000000037624 | 264.8281644  | -4.465054446   | 0.255653381 | -5.730628084 | 1.00059E-09  | 4.05908E-06 | 418         | 422         | 327          | 179          | 108          | 136          |              |              |
| Fst4         | ENSMUSG000000036264 | 24.65736113  | 2.949956187    | 0.519652097 | 5.676790691  | 1.37245E-08  | 5.44655E-06 | 6           | 5           | 6            | 34           | 56           | 41           |              |              |
| Cpa3         | ENSMUSG000000001865 | 57.95381033  | 1.815944878    | 0.32448714  | 5.596339313  | 2.18907E-08  | 8.50243E-06 | 27          | 190         | 186          | 134          | 379          | 371          |              |              |
| Ch1          | ENSMUSG000000030077 | 281.3478027  | 1.206816812    | 0.216101554 | 5.584489287  | 2.34388E-08  | 8.91407E-06 | 120         | 186         | 134          | 379          | 371          | 428          |              |              |
| Pyg2         | ENSMUSG000000029434 | 30.747092979 | -2.561023866   | 0.46064122  | -5.564366285 | 2.65107E-07  | 1.63208E-06 | 66          | 39          | 52           | 6            | 7            | 6            |              |              |
| Atp12b       | ENSMUSG000000031367 | 696.5804607  | 0.92856982     | 0.168724109 | 5.503424007  | 3.72485E-08  | 1.35994E-06 | 48          | 445         | 529          | 967          | 824          | 945          |              |              |
| Lyf6         | ENSMUSG000000034634 | 5895.589686  | -1.644395494   | 0.298992026 | -5.499797152 | 3.80228E-08  | 1.36099E-05 | 8995        | 9206        | 8563         | 2126         | 2159         | 4276         |              |              |
| Beam         | ENSMUSG000000002980 | 3901.500115  | -0.651860589   | 0.119143108 | -5.47124045  | 4.46896E-08  | 1.56886E-05 | 4690        | 4842        | 4772         | 3093         | 3009         | 3002         |              |              |
| Ckap2        | ENSMUSG000000037725 | 159.104734   | 1.431784668    | 0.262800805 | 5.448174584  | 5.08894E-08  | 1.7528E-05  | 98          | 92          | 69           | 225          | 181          | 281          |              |              |
| Apobce3      | ENSMUSG000000009585 | 237.3259051  | 0.969816691    | 0.178474497 | 5.433923083  | 5.15284E-08  | 1.86346E-05 | 196         | 193         | 173          | 346          | 395          | 361          |              |              |
| Ncam1        | ENSMUSG000000039542 | 236.6945035  | -1.167093931   | 0.217964939 | -5.354502045 | 8.57919E-08  | 2.84751E-05 | 320         | 283         | 380          | 137          | 135          | 166          |              |              |
| Cd5a1        | ENSMUSG000000026837 | 565.3864131  | 2.243681773    | 0.233980122 | 5.33814328   | 9.39032E-08  | 3.0108E-05  | 951         | 830         | 604          | 337          | 374          | 373          |              |              |
| Rfn2         | ENSMUSG000000025978 | 1918.492163  | -0.800912404   | 0.152260883 | -5.31330561  | 1.0764E-07   | 3.4473E-05  | 2683        | 2179        | 2466         | 1405         | 1413         | 1365         |              |              |
| Pha3         | ENSMUSG000000051048 | 202.6466646  | 1.545897005    | 0.294881699 | 5.242736368  | 1.58213E-07  | 4.9796E-05  | 83          | 120         | 107          | 609          | 211          | 669          |              |              |
| Atd1         | ENSMUSG000000038539 | 1046.063858  | -1.33372337    | 0.25993419  | -5.13100481  | 2.882E-07    | 8.91709E-05 | 2004        | 2649        | 1386         | 765          | 828          | 803          |              |              |
| Ch1          | ENSMUSG000000045658 | 1367.769562  | -1.05164338    | 0.205231538 | -5.124180173 | 2.98835E-07  | 9.02026E-05 | 2179        | 1332        | 1825         | 976          | 921          | 773          |              |              |
| Hra3         | ENSMUSG000000029434 | 31.34797416  | -1.33787416    | 0.251309816 | -5.119471611 | 3.69125E-07  | 1.25915E-05 | 25          | 25          | 15           | 78           | 130          | 130          |              |              |
| Cdgt5        | ENSMUSG000000027350 | 8095.581355  | -1.88705675    | 0.234087040 | -5.078049722 | 3.81329E-07  | 0.000112277 | 14303       | 8586        | 10873        | 4706         | 4533         | 5573         |              |              |
| Steap3       | ENSMUSG000000026389 | 310.1783864  | 1.015680981    | 0.200891592 | 5.055866053  | 4.28442E-07  | 0.000120286 | 203         | 239         | 173          | 428          | 432          | 385          |              |              |
| Hdc          | ENSMUSG000000027360 | 110.7635733  | -2.112889946   | 0.41815351  | -5.05290496  | 4.3514E-07   | 0.000120286 | 271         | 134         | 135          | 26           | 60           | 39           |              |              |
| Sg2          | ENSMUSG000000050711 | 2584.996508  | -1.286987469   | 0.254717831 | -5.052600602 | 4.35835E-07  | 0.000120286 | 4700        | 2642        | 3659         | 1359         | 1404         | 1745         |              |              |
| Per3         | ENSMUSG000000028957 | 572.1838259  | 1.434590944    | 0.28399042  | 5.051393596  | 4.38598E-07  | 0.000120286 | 226         | 420         | 281          | 939          | 905          | 663          |              |              |
| Hh1          | ENSMUSG000000040496 | 45.52000496  | -1.417545941   | 0.304352667 | -5.048352667 | 4.46353E-07  | 0.000120286 | 248         | 221         | 289          | 160          | 160          | 160          |              |              |
| Npas2        | ENSMUSG000000025077 | 128.286461   | -3.33086666    | 0.66072031  | -5.04556764  | 4.4555E-07   | 0.000120286 | 492         | 131         | 78           | 11           | 20           | 38           |              |              |
| Tab2a        | ENSMUSG000000058672 | 1237.174186  | 1.034832624    | 0.205139867 | 5.04452251   | 4.54656E-07  | 0.000120286 | 747         | 904         | 783          | 2760         | 1326         | 1902         |              |              |
| Per2         | ENSMUSG00           |              |                |             |              |              |             |             |             |              |              |              |              |              |              |



Table S4. Genes differentially expressed ABC\_Hoxb9 Male vs ABC\_Male

| Gene          | ENSEMBL_Gene_ID     | baseMean     | log2FoldChange | lfcSE       | stat         | pvalue          | padj        | Read count  |             |              |              |             |              |              |              |
|---------------|---------------------|--------------|----------------|-------------|--------------|-----------------|-------------|-------------|-------------|--------------|--------------|-------------|--------------|--------------|--------------|
|               |                     |              |                |             |              |                 |             | 166836_Norm | 166838_Norm | 182098_Turq1 | 182099_Turq1 | 182099_Norm | 182083_Turq1 | 182086_Turq1 | 182086_Turq1 |
| Lutrb2b       | ENSMUSG00000045136  | 418.5396414  | 1.023461693    | 0.241586642 | 4.236416726  | 2.71151e-05     | 0.002879157 | 232         | 338         | 258          | 555          | 460         | 668          |              |              |
| Srsfb1        | ENSMUSG00000002228  | 4.208243493  | 1.201238223    | 0.286431446 | 4.208243493  | 2.03123e-05     | 0.002879157 | 531         | 548         | 285          | 229          | 265         | 164          |              |              |
| Lutrb         | ENSMUSG00000001247  | 283.1756427  | -1.108270339   | 0.263881828 | -4.199873661 | 4.67006e-05     | 0.00339214  | 426         | 297         | 439          | 136          | 204         | 199          |              |              |
| Klrg2         | ENSMUSG00000071537  | 245.895666   | -0.978859296   | 0.234352281 | -4.176871208 | 2.95546e-05     | 0.003670202 | 316         | 280         | 383          | 164          | 193         | 338          |              |              |
| Psk1n         | ENSMUSG00000003978  | 383.7963342  | -0.968025839   | 0.232271051 | -4.167656005 | 3.07748e-05     | 0.003795904 | 524         | 426         | 575          | 207          | 265         | 309          |              |              |
| Hox6          | ENSMUSG00000001661  | 75.279327    | -0.721850596   | 0.173300011 | -4.165323424 | 3.10911e-05     | 0.003809187 | 929         | 959         | 1022         | 617          | 646         | 502          |              |              |
| Faim2         | ENSMUSG00000023011  | 186.8510305  | -1.320852704   | 0.137591612 | -4.15965292  | 3.18732e-05     | 0.003878963 | 382         | 193         | 226          | 90           | 121         | 109          |              |              |
| Zowim6        | ENSMUSG00000003517  | 353.8321032  | -0.765381377   | 0.185644237 | -4.157199204 | 3.211570920e-05 | 0.00390304  | 428         | 172         | 454          | 483          | 444         | 444          |              |              |
| Pknox1        | ENSMUSG00000029153  | 600.0175208  | 0.820427614    | 0.197690863 | 4.150053279  | 3.32398e-05     | 0.003992055 | 473         | 480         | 349          | 807          | 784         | 708          |              |              |
| Oid2          | ENSMUSG000000030867 | 75.24432344  | 1.372584478    | 0.331057263 | 4.146063629  | 3.38242e-05     | 0.004035666 | 43          | 34          | 49           | 84           | 98          | 144          |              |              |
| Chacp1        | ENSMUSG00000027313  | 77.72657713  | -1.379538766   | 0.332627834 | -4.142629492 | 3.43346e-05     | 0.004065097 | 130         | 124         | 83           | 42           | 55          | 32           |              |              |
| Ragap1        | ENSMUSG00000023015  | 157.7841987  | 1.059080788    | 0.255728818 | 4.141421363  | 3.45161e-05     | 0.004065097 | 119         | 104         | 84           | 182          | 199         | 258          |              |              |
| Cdc2          | ENSMUSG00000048922  | 42.83430558  | 1.600410171    | 0.387753942 | 4.127385946  | 3.66911e-05     | 0.004266612 | 26          | 25          | 13           | 57           | 56          | 102          |              |              |
| Lm2           | ENSMUSG00000029228  | 152.753716   | -1.28522923    | 0.335620789 | -4.127364205 | 3.69695e-05     | 0.004266612 | 310         | 167         | 75           | 111          | 68          |              |              |              |
| Actg1         | ENSMUSG00000062825  | 18153.77224  | 0.629414448    | 0.152608351 | 4.124377477  | 3.71397e-05     | 0.004294995 | 12984       | 15636       | 14146        | 23458        | 25312       | 20387        |              |              |
| Trf4          | ENSMUSG00000017386  | 309.3234089  | 0.794445591    | 0.19400769  | 4.094918047  | 4.22318e-05     | 0.004848686 | 240         | 250         | 189          | 383          | 381         | 414          |              |              |
| Neto2         | ENSMUSG00000036902  | 125.3040039  | 0.882450042    | 0.126704236 | 4.072140246  | 4.65831e-05     | 0.005290626 | 82          | 88          | 95           | 160          | 151         | 176          |              |              |
| Sloc1411      | ENSMUSG00000074796  | 92.41990767  | -1.555342622   | 0.381983559 | -4.071752786 | 4.66607e-05     | 0.005290626 | 107         | 171         | 135          | 69           | 45          | 27           |              |              |
| Suox          | ENSMUSG00000049858  | 659.1906882  | -0.712076157   | 0.175500462 | -4.057299148 | 4.96222e-05     | 0.00555291  | 897         | 804         | 754          | 561          | 453         | 483          |              |              |
| Lrat          | ENSMUSG00000028003  | 19.3275844   | -1.270239728   | 0.682811146 | -4.057215112 | 4.96575e-05     | 0.00555291  | 79          | 72          | 67           | 164          | 122         | 144          |              |              |
| Dhh           | ENSMUSG00000023000  | 432.0742937  | -0.9257802     | 0.228251019 | -4.055974004 | 4.99258e-05     | 0.00555291  | 665         | 599         | 434          | 327          | 299         | 268          |              |              |
| Cpeb1         | ENSMUSG00000025586  | 520.8678764  | 0.967181581    | 0.238678455 | 4.052236645  | 5.07303e-05     | 0.005612617 | 351         | 354         | 353          | 867          | 692         | 508          |              |              |
| Pdgr1         | ENSMUSG00000032006  | 1118.628583  | -0.760313781   | 0.187830337 | -4.046906342 | 5.18996e-05     | 0.005707326 | 1503        | 1494        | 1223         | 956          | 796         | 740          |              |              |
| Evf4          | ENSMUSG00000017724  | 122.4242107  | 0.942811535    | 0.233150257 | 4.043793675  | 5.25932e-05     | 0.005749036 | 93          | 84          | 75           | 168          | 176         | 140          |              |              |
| Tspan11       | ENSMUSG00000030351  | 977.1613964  | -1.118975187   | 0.277710736 | -4.028622026 | 5.61047e-05     | 0.005885548 | 1507        | 1037        | 1471         | 680          | 747         | 600          |              |              |
| Gm21857       | ENSMUSG00000000992  | 100.2022919  | 0.24889255     | 0.398694967 | 4.027369827  | 5.63716e-05     | 0.005885548 | 72          | 67          | 164          | 421          | 464         | 208          |              |              |
| Cna2          | ENSMUSG00000027715  | 143.9642223  | 1.058331069    | 0.262783111 | 4.027390722  | 5.63993e-05     | 0.005885548 | 122         | 86          | 73           | 180          | 195         | 248          |              |              |
| Sord          | ENSMUSG00000027227  | 5442.175027  | 0.852213272    | 0.121733615 | 4.024931377  | 5.69919e-05     | 0.005885548 | 3046        | 3995        | 4600         | 7689         | 7122        | 6202         |              |              |
| Ptprn         | ENSMUSG00000026204  | 209.2467642  | -1.045424662   | 0.259820211 | -4.023646419 | 5.73098e-05     | 0.005885548 | 361         | 258         | 227          | 123          | 158         | 122          |              |              |
| Camkv         | ENSMUSG00000032936  | 1616.278286  | 0.815978385    | 0.202770784 | 4.023254089  | 5.73995e-05     | 0.005885548 | 1032        | 1197        | 1285         | 2295         | 2234        | 1675         |              |              |
| h4305731Rik   | ENSMUSG00000039620  | 174.2666173  | 0.970284357    | 0.241196295 | 4.022799585  | 5.75104e-05     | 0.005885548 | 117         | 112         | 124          | 256          | 260         | 156          |              |              |
| Sic1a2        | ENSMUSG00000001740  | 1959.4244708 | 1.631967978    | 0.157157116 | 4.022325701  | 5.752205701     | 0.005885548 | 513         | 512         | 513          | 843          | 855         | 855          |              |              |
| Dhh           | ENSMUSG00000000889  | 1248.142421  | -0.997680203   | 0.24056191  | -4.021992748 | 5.77078e-05     | 0.005885548 | 1974        | 1317        | 1609         | 689          | 761         | 1048         |              |              |
| Dhc           | ENSMUSG00000020182  | 202.2759688  | -1.262810715   | 0.314300967 | -4.017839108 | 5.87343e-05     | 0.006057594 | 278         | 204         | 375          | 144          | 127         | 144          |              |              |
| Myot          | ENSMUSG00000024471  | 56.33413627  | 1.489116893    | 0.370820691 | 4.015733013  | 5.92613e-05     | 0.006077614 | 31          | 34          | 24           | 113          | 80          | 57           |              |              |
| D930160D6Rik  | ENSMUSG00000097392  | 107.0065075  | 1.209674013    | 0.302801716 | 3.994937195  | 6.47114e-05     | 0.006959479 | 65          | 47          | 82           | 119          | 179         | 150          |              |              |
| Wisp2         | ENSMUSG00000027656  | 27.53785264  | 2.186898976    | 0.547867235 | 3.991660268  | 6.56123e-05     | 0.006959479 | 72          | 43          | 24           | 9            | 24          | 71           |              |              |
| Fam2          | ENSMUSG00000004044  | 1959.5792984 | 1.47653928     | 0.137730451 | 3.988694924  | 6.59437e-05     | 0.006959479 | 2366        | 2444        | 2172         | 1631         | 1623        | 1523         |              |              |
| Fam4a         | ENSMUSG00000020808  | 61.2169183   | 1.503846138    | 0.37227773  | 3.979473224  | 6.70344e-05     | 0.006885059 | 44          | 26          | 26           | 70           | 79          | 122          |              |              |
| Rn1h4         | ENSMUSG00000047638  | 188.2740738  | 0.938459797    | 0.235426862 | 3.986205269  | 6.71384e-05     | 0.006885059 | 135         | 120         | 132          | 303          | 203         | 236          |              |              |
| Rnd3          | ENSMUSG00000017144  | 562.0778444  | 0.801450268    | 0.201188466 | 3.983579601  | 6.78849e-05     | 0.006885059 | 332         | 467         | 431          | 783          | 688         | 671          |              |              |
| Kcnn2         | ENSMUSG00000054477  | 463.1750722  | 0.731446193    | 0.183645116 | 3.982932997  | 6.80707e-05     | 0.006885059 | 2874        | 3521        | 4052         | 5619         | 6263        | 6081         |              |              |
| Srsf23        | ENSMUSG00000042195  | 37.2392264   | -1.539792276   | 0.386264481 | -3.982656736 | 6.81492e-05     | 0.006885059 | 45          | 72          | 49           | 18           | 24          | 61           |              |              |
| Id2b94        | ENSMUSG00000033581  | 282.886669   | 0.698542651    | 0.175511186 | 3.979910265  | 6.89413e-05     | 0.006790071 | 236         | 214         | 196          | 347          | 346         | 355          |              |              |
| Pg57bp        | ENSMUSG00000021719  | 377.4442783  | 0.813921858    | 0.240803114 | 3.974167392  | 7.02629e-05     | 0.006857848 | 290         | 269         | 262          | 560          | 490         | 393          |              |              |
| Rc3h2         | ENSMUSG00000061601  | 122.3815225  | -1.29127948    | 0.325665306 | -3.965050798 | 7.33803e-05     | 0.007087607 | 237         | 171         | 113          | 78           | 63          | 72           |              |              |
| Fam81b1       | ENSMUSG00000051515  | 335.0259434  | -0.63348465    | 0.159833141 | -3.963412386 | 7.38866e-05     | 0.007098888 | 399         | 405         | 418          | 273          | 251         | 263          |              |              |
| Tp2           | ENSMUSG00000027469  | 144.7638874  | 0.96516283     | 0.243611822 | 3.961784883  | 7.43196e-05     | 0.007110041 | 114         | 96          | 85           | 190          | 162         | 222          |              |              |
| Camk2b        | ENSMUSG00000057897  | 400.1141863  | -1.041329948   | 0.265207226 | -3.941747607 | 7.88991e-05     | 0.007690876 | 543         | 647         | 567          | 255          | 242         | 317          |              |              |
| Nduf412       | ENSMUSG00000040280  | 240.4354708  | 1.906539219    | 0.23094064  | 3.926033155  | 8.63582e-05     | 0.008188238 | 302         | 269         | 370          | 154          | 158         | 149          |              |              |
| Mm2           | ENSMUSG00000032688  | 919.7664413  | 0.768525872    | 0.196926278 | 3.902607008  | 9.51621e-05     | 0.008954562 | 609         | 837         | 596          | 1159         | 1136        | 1182         |              |              |
| E130012A19Rik | ENSMUSG00000043439  | 118.9157044  | 0.868885815    | 0.222834806 | 3.899237431  | 9.64961e-05     | 0.009033521 | 73          | 86          | 94           | 156          | 156         | 149          |              |              |
| Spep          | ENSMUSG00000026207  | 248.1606696  | -0.68293129    | 0.175361854 | -3.894422384 | 9.84338e-05     | 0.009167829 | 301         | 321         | 295          | 185          | 203         | 182          |              |              |
| Rev1          | ENSMUSG00000026082  | 634.3872379  | 0.729592607    | 0.187476324 | 3.891651974  | 9.95646e-05     | 0.009226095 | 468         | 517         | 447          | 919          | 765         | 600          |              |              |
| Mybl2         | ENSMUSG00000061740  | 1029.84444   | 0.629959651    | 0.162397896 | 3.88524709   | 0.00102226      | 0.009377554 | 1183        | 1197        | 1375         | 757          | 757         | 1050         |              |              |
| Aurkb         | ENSMUSG00000020897  | 64.6370226   | 1.323940721    | 0.342034039 | 3.870786441  | 0.00108485      | 0.00909195  | 45          | 32          | 34           | 65           | 95          | 117          |              |              |
| Thra          | ENSMUSG00000058756  | 2150.000944  | -0.74266064    | 0.19201283  | -3.867765715 | 0.00109837      | 0.009975505 | 3109        | 2176        | 2790         | 1501         | 1656        | 1669         |              |              |
| Rtnr4b        | ENSMUSG00000045287  | 5413.863694  | -0.564513715   | 0.146156038 | -3.864033342 | 0.00112277      | 0.010146575 | 6149        | 6089        | 6871         | 4524         | 4610        | 3970         |              |              |
| Cyb4          | ENSMUSG00000066975  | 89.18947543  | -1.882307362   | 0.489042365 | -3.848958638 | 0.00118618      | 0.01066814  | 182         | 171         | 69           | 48           | 17          | 49           |              |              |
| Ftntm108      | ENSMUSG00000042757  | 400.1141863  | -1.041329948   | 0.265207226 | -3.833331327 | 0.00121277      | 0.01092049  | 44          | 44          | 27           | 69           | 84          | 81           |              |              |
| Npas4         | ENSMUSG00000045903  | 10.18372322  | 0.811161757    | 1.515350517 | 3.834630833  | 0.00125634      | 0.011185758 | 0           | 1           | 0            | 2            | 2           | 31           |              |              |
| Gm2a          | ENSMUSG00000000594  | 705.545762   | -0.497122103   | 0.129678361 | -3.833500823 | 0.00126332      | 0.011195314 | 8438        | 8253        | 8093         | 5732         | 5730        | 6259         |              |              |
| Ctd1e1        | ENSMUSG00000051159  | 224.5901391  | -1.46933284    | 0.384699298 | -3.819438432 | 0.00133756      | 0.011795714 | 225         | 304         | 462          | 84           | 93          | 180          |              |              |
| Pkb           | ENSMUSG00000020233  | 113.9715047  | 1.29020434     | 0.33861256  | 3.810267228  | 0.00138817      | 0.012131878 | 90          | 57          | 51           | 131          | 136         | 218          |              |              |
| Dusp26        | ENSMUSG00000039661  | 42.00715353  | -1.380618706   | 0.362355282 | -3.810124418 | 0.00138897      | 0.012131878 | 59          | 50          | 76           | 18           | 25          | 28           |              |              |
| Srsf5         | ENSMUSG00000039718  | 40.13120254  | -1.380618706   | 0.362355282 | -3.810124418 | 0.00138897      | 0.012131878 | 59          | 50          | 76           | 18           | 25          | 28           |              |              |
| Ragap1        | ENSMUSG00000032556  | 318.0220267  | 1.267824371    | 0.334212823 | 3.793320626  | 0.00148621      | 0.012852802 | 116         | 157         | 287          | 435          | 462         | 451          |              |              |
| Inhb          | ENSMUSG00000037035  | 137.7303923  | 0.831119833    | 0.219212528 | 3.791388389  | 0.00149807      | 0.012861515 | 84          | 101         | 113          | 174          | 178         | 177          |              |              |
| Filip1l       | ENSMUSG00000043336  | 902.4789056  | -0.648486979   | 0.171061601 | -3.79095     |                 |             |             |             |              |              |             |              |              |              |

Table S4. Genes differentially expressed ABC\_Hoxb9 Male vs ABC Female

| Gene          | ENSEMBL_Gene_ID    | baseMean     | log2FoldChange | lfcSE       | stat         | pvalue      | padj        | Read count  |             |              |              |
|---------------|--------------------|--------------|----------------|-------------|--------------|-------------|-------------|-------------|-------------|--------------|--------------|
|               |                    |              |                |             |              |             |             | 166836_Norm | 166838_Norm | 182098_Tur19 | 182083_Tur19 |
| Neil2         | ENSMUSG0000022454  | 13.6119197   | 2.283414696    | 0.647390655 | 3.527104816  | 0.00024013  | 0.026722929 | 3           | 8           | 3            | 8            |
| Bu2           | ENSMUSG0000022455  | 65.12388888  | 1.471402227    | 0.124636904 | 11.521166329 | 0.00024013  | 0.026722929 | 63          | 38          | 31           | 125          |
| Bu2           | ENSMUSG0000022456  | 468.7333698  | 0.571779987    | 0.162802988 | -5.12109761  | 0.000444585 | 0.028082676 | 160         | 529         | 54           | 254          |
| Pr5           | ENSMUSG0000036106  | 164.6942232  | -0.834666144   | 0.237886612 | -3.50893772  | 0.0004499   | 0.028320445 | 179         | 192         | 262          | 117          |
| Dusp14        | ENSMUSG0000018648  | 244.0798448  | 0.107915861    | 0.290237444 | 3.507183102  | 0.000452877 | 0.028409887 | 134         | 154         | 197          | 245          |
| Spry1         | ENSMUSG0000037211  | 947.0523941  | -0.554648395   | 0.158275488 | -3.504322756 | 0.00045777  | 0.028618475 | 1119        | 1232        | 1029         | 717          |
| Sic3a1        | ENSMUSG0000023942  | 2721.789601  | -0.654796013   | 0.187242401 | -3.497049857 | 0.000470434 | 0.029298967 | 3251        | 3928        | 2808         | 2251         |
| Nhr3p1        | ENSMUSG0000023943  | 101.79220000 | 0.01182969573  | 0.291129217 | 0.495249127  | 0.000470434 | 0.029298967 | 82          | 91          | 38           | 26           |
| Synd          | ENSMUSG0000009394  | 98.57744984  | -0.964846232   | 0.276036949 | -3.495513748 | 0.000473437 | 0.029296947 | 161         | 122         | 108          | 78           |
| Cd55          | ENSMUSG0000026399  | 111.840714   | -1.623283819   | 0.464812527 | -3.492340947 | 0.000478807 | 0.029529106 | 195         | 75          | 237          | 45           |
| Col2e2        | ENSMUSG0000036103  | 873.3304301  | -0.490763072   | 0.140767122 | -3.486344835 | 0.000489669 | 0.030097354 | 1015        | 1076        | 970          | 707          |
| Akr1b7        | ENSMUSG0000052131  | 8573.060795  | -0.909560066   | 0.261100182 | -3.483567343 | 0.000494779 | 0.030149578 | 10965       | 14513       | 7086         | 5885         |
| Utp18         | ENSMUSG0000054079  | 639.3703159  | 0.502137816    | 0.144261483 | 3.48074764   | 0.000500016 | 0.030149578 | 519         | 513         | 557          | 725          |
| Nhr1          | ENSMUSG0000027335  | 91.16287527  | -1.57388594    | 0.452172477 | -3.480720248 | 0.000500057 | 0.030149578 | 146         | 64          | 200          | 50           |
| Nptx1         | ENSMUSG0000025582  | 68.23170099  | -1.55352757    | 0.446357496 | -3.480455876 | 0.000500561 | 0.030149578 | 146         | 89          | 71           | 55           |
| Smad6         | ENSMUSG0000036867  | 224.7208814  | -0.61200645    | 0.175866017 | -3.479958558 | 0.000501491 | 0.030149578 | 258         | 278         | 279          | 181          |
| CdkSpr2       | ENSMUSG0000039298  | 3280.344347  | 0.44560483     | 0.128062702 | 3.47958323   | 0.000502194 | 0.030149578 | 2699        | 2708        | 3789         | 1882         |
| A730017C2ORik | ENSMUSG0000050875  | 69.50165731  | -1.930487092   | 0.267438293 | -3.479259017 | 0.000502802 | 0.030149578 | 83          | 88          | 103          | 50           |
| Klf11         | ENSMUSG0000012443  | 77.36959602  | 1.158681146    | 0.333156437 | 3.47788911   | 0.000503579 | 0.030149578 | 69          | 42          | 32           | 109          |
| Ncapg         | ENSMUSG0000015880  | 38.86786156  | 1.471402227    | 0.223295075 | 3.476336904  | 0.000508264 | 0.030149578 | 32          | 17          | 13           | 47           |
| Phox2a        | ENSMUSG0000007946  | 88.09303764  | -1.352575759   | 0.389867473 | -3.476247317 | 0.000508483 | 0.030149578 | 133         | 77          | 170          | 36           |
| Tsh2          | ENSMUSG00000047907 | 1678.800815  | -0.68503661    | 0.19706818  | -3.476140144 | 0.000508686 | 0.030149578 | 1967        | 2467        | 1776         | 1444         |
| Sih3bp5       | ENSMUSG0000021892  | 1436.020814  | -0.480246356   | 0.138233521 | -3.474167139 | 0.000512442 | 0.030224382 | 1603        | 1711        | 1705         | 1137         |
| Resp18        | ENSMUSG0000033061  | 165.9197902  | -1.408043716   | 0.405339514 | -3.473739095 | 0.00051326  | 0.030224382 | 231         | 158         | 335          | 53           |
| Hmo2          | ENSMUSG0000038193  | 200.1790172  | -1.542684988   | 0.444301109 | -3.472161012 | 0.00051287  | 0.030243509 | 268         | 158         | 469          | 62           |
| Aunip         | ENSMUSG0000037821  | 40.59100000  | 0.432524462    | 0.21531122  | 3.471942126  | 0.000514908 | 0.030243509 | 21          | 54          | 39           | 79           |
| Sic3d3        | ENSMUSG0000050473  | 69.28962292  | -2.87917397    | 0.371834442 | -3.463885044 | 0.00052683  | 0.031076070 | 100         | 69          | 126          | 43           |
| M10015O1ORik  | ENSMUSG0000026051  | 4188.267013  | 1.419620717    | 0.410080253 | 3.461746333  | 0.000536683 | 0.031201093 | 1991        | 2558        | 2289         | 3275         |
| Stem          | ENSMUSG0000009376  | 73.12490383  | -1.266246211   | 0.366271548 | -3.457124143 | 0.000545973 | 0.031640453 | 132         | 102         | 77           | 29           |
| Igpc3         | ENSMUSG0000040797  | 39.95733316  | -1.390605471   | 0.402564127 | -3.454370064 | 0.00055158  | 0.031864214 | 83          | 48          | 42           | 21           |
| Nag2          | ENSMUSG0000020297  | 97.3894001   | -1.08855016    | 0.315393558 | -3.451418038 | 0.000557649 | 0.032070023 | 147         | 101         | 150          | 45           |
| Gars          | ENSMUSG0000020297  | 40.59100000  | 0.432524462    | 0.21531122  | 3.471942126  | 0.000514908 | 0.030243509 | 21          | 54          | 39           | 79           |
| Armud         | ENSMUSG0000049804  | 360.8250109  | -0.093167523   | 0.317013344 | -3.448332835 | 0.000554058 | 0.032278645 | 642         | 542         | 289          | 253          |
| Gm10644       | ENSMUSG0000074219  | 29.08878472  | -1.409587022   | 0.409247807 | -3.444336164 | 0.000572463 | 0.032657252 | 49          | 40          | 37           | 14           |
| Phox2b        | ENSMUSG0000012520  | 68.0192807   | -1.068556228   | 0.310520021 | -3.441183304 | 0.000579177 | 0.032937286 | 118         | 84          | 75           | 48           |
| Ady8          | ENSMUSG0000022376  | 92.45511696  | -1.574900999   | 0.458354198 | -3.435991217 | 0.00059039  | 0.033344955 | 146         | 175         | 80           | 24           |
| Necab3        | ENSMUSG0000027489  | 22.00895154  | 1.65053451     | 0.480454005 | 3.435366203  | 0.000591754 | 0.033344955 | 9           | 8           | 15           | 42           |
| Igfbp8        | ENSMUSG0000028661  | 23.74384804  | 1.84410851     | 0.538279864 | 3.435333504  | 0.000594955 | 0.033344955 | 12          | 10          | 6            | 28           |
| Gucy1a        | ENSMUSG0000023979  | 76.18577868  | -1.328464587   | 0.387723226 | -3.426323236 | 0.000611805 | 0.033436462 | 152         | 109         | 66           | 54           |
| Gm14519       | ENSMUSG0000082838  | 126.0752393  | 0.798930055    | 0.233577721 | 3.420403507  | 0.000625283 | 0.033063659 | 86          | 109         | 81           | 172          |
| Imnt          | ENSMUSG0000003477  | 38.8225443   | -1.26867365    | 0.37099743  | -3.419629214 | 0.000627065 | 0.033063659 | 69          | 50          | 45           | 25           |
| Col4a5        | ENSMUSG0000031274  | 438.854776   | -0.986248177   | 0.28864437  | -3.416827917 | 0.000633553 | 0.033153728 | 294         | 548         | 407          | 339          |
| Ptfl1         | ENSMUSG0000031595  | 113.6037861  | -0.83810651    | 0.24527458  | -3.41660677  | 0.000634068 | 0.033153728 | 243         | 261         | 172          | 164          |
| Nkx2          | ENSMUSG0000029338  | 1545.204258  | -0.69751025    | 0.204189833 | -3.416139158 | 0.000635157 | 0.033153728 | 720         | 2034        | 1007         | 1207         |
| Ncapd         | ENSMUSG0000034906  | 93.90620917  | 0.910847209    | 0.266859973 | 3.413202804  | 0.000642041 | 0.033409264 | 75          | 52          | 69           | 105          |
| Get4          | ENSMUSG0000025858  | 2442.791016  | -0.447955161   | 0.131360352 | -3.410212451 | 0.000649332 | 0.033626261 | 2641        | 2750        | 2136         | 1974         |
| Gpr55         | ENSMUSG0000049608  | 296.214638   | 0.938693834    | 0.275331808 | 3.409318532  | 0.000651254 | 0.033626261 | 231         | 247         | 131          | 376          |
| Gm12781       | ENSMUSG0000095123  | 102.5744931  | 0.944872341    | 0.277163885 | 3.409076993  | 0.000651831 | 0.033626261 | 87          | 64          | 59           | 112          |
| 953077C5ORik  | ENSMUSG0000036411  | 49.17536561  | -0.693244612   | 0.20355254  | -3.405560016 | 0.000650416 | 0.033598723 | 138         | 161         | 172          | 302          |
| Ptcl          | ENSMUSG0000033943  | 148.2720505  | -1.025376901   | 0.302089913 | -3.394176073 | 0.000658357 | 0.033788545 | 138         | 128         | 157          | 219          |
| Scg5          | ENSMUSG0000023236  | 110.2920724  | -1.00366853    | 0.295840031 | -3.392599872 | 0.000692327 | 0.033788545 | 169         | 108         | 164          | 68           |
| Gatm          | ENSMUSG0000027199  | 286.7730806  | -0.851598815   | 0.251042351 | -3.392255575 | 0.000693197 | 0.033788545 | 336         | 483         | 288          | 211          |
| Lym1          | ENSMUSG0000022594  | 5861.881691  | -0.973976888   | 0.287428105 | -3.388593087 | 0.000702522 | 0.033788545 | 9207        | 9175        | 4924         | 4774         |
| Klf15         | ENSMUSG0000030087  | 475.1878637  | -1.074719789   | 0.228476177 | -3.388525233 | 0.000702696 | 0.033772855 | 500         | 532         | 767          | 373          |
| Nkx2          | ENSMUSG0000025622  | 75.6922442   | -0.767293405   | 0.315019055 | -3.38177858  | 0.000720203 | 0.033772855 | 61          | 34          | 109          | 94           |
| Crabp1        | ENSMUSG0000032291  | 33.5064764   | -1.329660683   | 0.393306531 | -3.380723632 | 0.000722592 | 0.033772855 | 42          | 39          | 63           | 16           |
| Wnk2          | ENSMUSG0000037989  | 255.1720623  | -1.076091597   | 0.318304041 | -3.380703533 | 0.000723005 | 0.033772855 | 151         | 231         | 111          | 418          |
| Cttn3         | ENSMUSG0000008153  | 147.3542931  | 0.889775162    | 0.263281531 | 3.37955784   | 0.000726025 | 0.033827883 | 125         | 109         | 76           | 169          |
| Wnt6          | ENSMUSG0000033227  | 230.8433165  | -1.034985636   | 0.306768919 | -3.37838282  | 0.000741306 | 0.033914624 | 320         | 385         | 226          | 167          |
| Ehd2          | ENSMUSG0000074364  | 2054.028249  | -1.343550756   | 0.16396249  | -3.37581081  | 0.000741972 | 0.033914624 | 2570        | 2666        | 2093         | 1607         |
| Igfbp3        | ENSMUSG0000040457  | 49.17536561  | -0.693244612   | 0.20355254  | -3.37581081  | 0.000741972 | 0.033914624 | 140         | 143         | 154          | 87           |
| Sic3a2        | ENSMUSG0000033965  | 1021.202823  | -0.691469729   | 0.2058617   | -3.373336394 | 0.000786973 | 0.041282162 | 1480        | 1188        | 1116         | 837          |
| Cep85         | ENSMUSG0000037443  | 346.9467243  | -1.179983852   | 0.351913433 | -3.353051463 | 0.000792528 | 0.041745969 | 269         | 234         | 135          | 307          |
| Fstl3         | ENSMUSG0000020325  | 262.7154706  | -0.850355507   | 0.253636036 | -3.35266045  | 0.000800388 | 0.041745969 | 272         | 440         | 302          | 196          |
| Rab39b        | ENSMUSG0000031202  | 70.64140472  | -1.034501303   | 0.309230329 | -3.345406986 | 0.000821619 | 0.042731217 | 110         | 71          | 39           | 46           |
| Sgsm1         | ENSMUSG0000042216  | 55.40361214  | -1.17734905    | 0.352607656 | -3.344164404 | 0.000825208 | 0.042013616 | 104         | 64          | 63           | 34           |
| Tf1           | ENSMUSG0000025527  | 1.211791708  | 0.463191708    | 0.364191708 | 3.337351126  | 0.00083116  | 0.04311616  | 61          | 23          | 16           | 102          |
| HoxC5         | ENSMUSG0000022485  | 181.7893907  | -0.807079008   | 0.241900626 | -3.336411    | 0.000848676 | 0.04376435  | 201         | 216         | 277          | 148          |
| Me1           | ENSMUSG0000032418  | 31551.28546  | -0.485930698   | 0.145692922 | -3.335184583 | 0.000852428 | 0.043834007 | 35974       | 38107       | 36365        | 29261        |
| Cplx1         | ENSMUSG0000033615  | 42.91110991  | -1.3840753     | 0.41591056  | -3.32781957  | 0.000852885 | 0.04482961  | 63          | 82          | 41           | 27           |
| Tbx20         | ENSMUSG0000031965  | 61.4338865   | -1.134726964   | 0.341277864 | -3.325069934 | 0.000883964 | 0.045168247 | 113         | 61          | 34           | 38           |
| Asic2         | ENSMUSG0000033007  | 32.0542477   | -1.34355914    | 0.404139671 | -3.324490292 | 0.000885797 | 0.045168247 | 44          | 34          | 60           | 19           |
| Nkx1          | ENSMUSG0000050519  | 94.9923939   | -0.64549481    | 0.13875454  | -3.322179918 | 0.000891417 | 0.045168247 | 606         | 601         | 719          | 519          |
| Tmem130       | ENSMUSG0000043388  | 87.58060649  | -0.997593985   | 0.300285559 | -3.322173179 | 0.000893192 | 0.045292297 | 148         | 102         | 101          | 46           |
| Acnt2         | ENSMUSG0000021226  | 281.658112   | -0.630260909   | 0.189794631 | -3.320795186 | 0.000897614 | 0.045390416 | 311         | 341         | 375          | 199          |
| Cd3np         | ENSMUSG0000042489  | 35.2751195   | -1.307023474   | 0.393778105 | -3.319103492 | 0.00090307  | 0.04554015  | 28          | 15          | 18           | 57           |
| Dpep1         | ENSMUSG0000019278  | 634.8936786  | -0.742600922   | 0.22        |              |             |             |             |             |              |              |

Table S4. Genes differentially expressed Adx\_Hoxb9 Male vs CB3 Male

| Gene          | ENSEMBL_Gene_ID      | baseMean     | log2FoldChange | lfcSE       | stat         | pvalue      | padj        | Read count  |             |              |             |              |              |
|---------------|----------------------|--------------|----------------|-------------|--------------|-------------|-------------|-------------|-------------|--------------|-------------|--------------|--------------|
|               |                      |              |                |             |              |             |             | 166836_Norm | 166838_Norm | 182098_Tur19 | 169229_Norm | 182083_Tur19 | 182086_Tur19 |
| Kcnq1         | ENSMUSG00000009545   | 116.3147942  | -0.802057493   | 0.253964108 | -3.158152931 | 0.001587722 | 0.067299806 | 141         | 171         | 131          | 87          | 98           | 69           |
| Sh2b2a        | ENSMUSG00000008626   | 190.8688956  | -0.93519496    | 0.296330405 | -3.157283263 | 0.001587722 | 0.067299806 | 314         | 279         | 159          | 140         | 126          | 147          |
| Ckap2l        | ENSMUSG000000048327  | 72.49704332  | 1.037498647    | 0.328763195 | 3.155755848  | 0.001600828 | 0.067585075 | 61          | 50          | 31           | 85          | 84           | 114          |
| Gm6665        | ENSMUSG000000091561  | 41.184502    | -0.810904844   | 0.256990464 | -3.155344649 | 0.001603086 | 0.067585075 | 485         | 423         | 695          | 264         | 293          | 356          |
| Chd1          | ENSMUSG000000023852  | 2851.62008   | 0.559219325    | 0.177474065 | 3.150999176  | 0.001621729 | 0.068415904 | 2262        | 2468        | 2187         | 3986        | 3201         | 3005         |
| Klf20a        | ENSMUSG00000003779   | 156.6086389  | 1.024186009    | 0.325093768 | 3.150432616  | 0.001630289 | 0.068415904 | 134         | 115         | 60           | 197         | 188          | 245          |
| Gm9890        | ENSMUSG000000096606  | 1371.863761  | -0.814338894   | 0.258755164 | -3.147440641 | 0.001648756 | 0.06875129  | 2178        | 1812        | 1257         | 1140        | 816          | 1028         |
| Dnt4          | ENSMUSG000000039982  | 405.441104   | -0.862317492   | 0.27129036  | -3.146893136 | 0.001654644 | 0.06875129  | 529         | 467         | 351          | 268         | 220          | 283          |
| Cadm1         | ENSMUSG000000032076  | 1312.717482  | 0.500903997    | 0.161748964 | 3.146876403  | 0.001650247 | 0.06875129  | 1110        | 1008        | 1132         | 1462        | 1733         | 1430         |
| Strn1         | ENSMUSG000000028832  | 558.8057251  | 0.76784998     | 0.244097832 | 3.145664891  | 0.001657098 | 0.06875129  | 376         | 357         | 508          | 652         | 589          | 871          |
| Gm10038       | ENSMUSG000000058281  | 9.40749792   | 2.220378256    | 0.705853946 | 3.145662454  | 0.001657111 | 0.06875129  | 5           | 3           | 2            | 16          | 14           | 17           |
| Nov1          | ENSMUSG000000021047  | 142.2760962  | -0.949480859   | 0.301910627 | -3.144907052 | 0.001661396 | 0.068772755 | 157         | 162         | 244          | 90          | 77           | 124          |
| Unc5c         | ENSMUSG000000059921  | 39.2391915   | -1.245444395   | 0.396176427 | -3.143661027 | 0.001668486 | 0.068844244 | 72          | 43          | 50           | 16          | 27           | 27           |
| C7            | ENSMUSG000000079105  | 327.1272933  | -1.569649821   | 0.49597016  | -3.143248874 | 0.001670656 | 0.068844244 | 757         | 574         | 137          | 167         | 159          | 169          |
| Ampc3         | ENSMUSG00000005686   | 483.3639867  | 0.674553572    | 0.214854799 | 3.139578805  | 0.001691909 | 0.069418024 | 557         | 501         | 726          | 345         | 414          | 359          |
| Tia1          | ENSMUSG000000071337  | 581.671761   | 0.580307543    | 0.184874868 | 3.138920662  | 0.001695714 | 0.069418024 | 553         | 427         | 419          | 674         | 699          | 718          |
| Gstm7         | ENSMUSG00000004035   | 789.8977761  | -0.592606859   | 0.188809555 | -3.138648016 | 0.001697292 | 0.069418024 | 888         | 855         | 1107         | 560         | 676          | 654          |
| Grb14         | ENSMUSG000000026888  | 1388.92635   | 0.874278727    | 0.278591023 | 3.138215178  | 0.0016998   | 0.069418024 | 999         | 764         | 1179         | 1233        | 2124         | 2035         |
| Prr16         | ENSMUSG000000073565  | 280.0366035  | 0.915500518    | 0.291905294 | 3.136292958  | 0.001710982 | 0.069898949 | 166         | 233         | 184          | 504         | 314          | 281          |
| Cebpβ         | ENSMUSG000000042359  | 151.3663739  | -0.965462396   | 0.307846318 | -3.136183674 | 0.00171162  | 0.069898949 | 242         | 231         | 128          | 119         | 95           | 94           |
| Gm43843       | ENSMUSG000000106944  | 97.60850072  | 0.866750797    | 0.27660699  | 3.133510097  | 0.00172729  | 0.069823582 | 89          | 64          | 54           | 118         | 120          | 140          |
| Pon2          | ENSMUSG000000032667  | 1884.132818  | -0.621646211   | 0.198394051 | -3.13339244  | 0.001727982 | 0.069823582 | 2449        | 2443        | 1959         | 1756        | 1396         | 1301         |
| Pon3          | ENSMUSG000000029759  | 53.5014818   | -0.968221194   | 0.309015558 | -3.133244165 | 0.001728856 | 0.069823582 | 1012        | 659         | 447          | 385         | 367          | 331          |
| Rps6ka1       | ENSMUSG000000003644  | 599.8237356  | 0.604560801    | 0.193096994 | 3.130865941  | 0.001742917 | 0.070236093 | 514         | 486         | 949          | 606         | 752          | 813          |
| Rfbp3         | ENSMUSG000000025576  | 190.1138685  | 1.078657383    | 0.344644214 | 3.129770757  | 0.001749428 | 0.070343177 | 83          | 114         | 169          | 181         | 260          | 333          |
| Nfat2         | ENSMUSG000000020222  | 425.811104   | -1.336734407   | 0.427580655 | -3.126274287 | 0.001770363 | 0.071028539 | 297         | 389         | 382          | 242         | 116          | 66           |
| Cnrm          | ENSMUSG000000068101  | 24.58861117  | 1.28683928     | 0.412172853 | 3.122086455  | 0.001795742 | 0.071476126 | 14          | 14          | 15           | 32          | 31           | 41           |
| Vat1l         | ENSMUSG000000046844  | 84.6656803   | -1.141334252   | 0.365572685 | -3.122044667 | 0.001795997 | 0.071476126 | 175         | 78          | 97           | 56          | 54           | 48           |
| Gm13889       | ENSMUSG000000087006  | 321.2494048  | -0.181680229   | 0.347053315 | -3.116755213 | 0.001828533 | 0.072793456 | 332         | 331         | 646          | 152         | 199          | 267          |
| Lcd3          | ENSMUSG000000023505  | 97.80415825  | 0.990097468    | 0.317699155 | 3.116462387  | 0.00183035  | 0.072793456 | 78          | 57          | 62           | 96          | 118          | 114          |
| Utrn          | ENSMUSG000000036295  | 2654.602278  | 0.624321934    | 0.200371107 | 3.115828139  | 0.001834291 | 0.072793456 | 2123        | 2428        | 1715         | 3561        | 3268         | 2876         |
| Sema3b        | ENSMUSG000000057969  | 140.8623256  | -0.668449887   | 0.21473904  | -3.112962944 | 0.001835448 | 0.073385448 | 159         | 177         | 108          | 182         | 108          | 166          |
| Gm10561       | ENSMUSG000000097649  | 202.6012222  | -0.793740801   | 0.255139721 | -3.111004428 | 0.001845211 | 0.073660999 | 215         | 241         | 315          | 160         | 117          | 167          |
| Ng1           | ENSMUSG000000029126  | 227.1705061  | -0.760569108   | 0.244523491 | -3.110413254 | 0.001868258 | 0.073660999 | 283         | 228         | 347          | 143         | 188          | 175          |
| Gm43858       | ENSMUSG000000104546  | 25.9689143   | 1.257628255    | 0.404594721 | 3.108365454  | 0.001881253 | 0.07392814  | 15          | 12          | 19           | 37          | 38           | 35           |
| Sult1a1       | ENSMUSG000000018865  | 35.68150072  | -1.094986167   | 0.352304181 | -3.108070318 | 0.001883133 | 0.07392814  | 51          | 39          | 55           | 23          | 23           | 22           |
| Sprp7         | ENSMUSG000000004127  | 343.0187774  | -1.35690253    | 0.436813634 | -3.106497023 | 0.001893182 | 0.074163176 | 58          | 55          | 29           | 24          | 15           | 17           |
| Nkx2-1        | ENSMUSG000000057969  | 20.15502001  | 1.418001199    | 0.456589201 | 3.105639713  | 0.001898639 | 0.074163176 | 10          | 12          | 29           | 24          | 14           | 14           |
| Adsp          | ENSMUSG000000033952  | 71.82439524  | 1.205365975    | 0.388443211 | 3.103086715  | 0.001915252 | 0.074707092 | 55          | 54          | 21           | 85          | 102          | 114          |
| Cenpf         | ENSMUSG000000026605  | 173.6805866  | 0.954891266    | 0.308312697 | 3.09715194   | 0.001953897 | 0.075921734 | 157         | 126         | 72           | 216         | 224          | 247          |
| Gbp2b         | ENSMUSG000000040264  | 83.05693929  | -3.804826358   | 1.228540856 | -3.097028755 | 0.001954709 | 0.075921734 | 171         | 18          | 286          | 5           | 16           | 13           |
| Pkrab2        | ENSMUSG00000002997   | 3069.337866  | -0.617605383   | 0.199461575 | -3.096362711 | 0.001959106 | 0.07593094  | 3664        | 4436        | 3049         | 2629        | 2205         | 2433         |
| Spry2         | ENSMUSG00000002114   | 645.489748   | 0.466681344    | 0.15081185  | 3.094466071  | 0.00197171  | 0.076257574 | 683         | 689         | 777          | 956         | 1014         | 973          |
| Rasgef1       | ENSMUSG000000024479  | 248.581819   | -1.336734407   | 0.427580655 | -3.093436298 | 0.001979853 | 0.076359555 | 187         | 201         | 144          | 117         | 104          | 101          |
| Zbtb42        | ENSMUSG000000037638  | 145.37386    | -1.00746182    | 0.32597279  | -3.092229918 | 0.001986589 | 0.076440362 | 179         | 258         | 145          | 128         | 87           | 74           |
| AT37004619Rik | ENSMUSG000000085139  | 45.24189541  | -1.340559694   | 0.433575686 | -3.091870089 | 0.001988999 | 0.076440362 | 100         | 44          | 50           | 20          | 30           | 27           |
| Rim2          | ENSMUSG000000043496  | 586.6500862  | -0.7738647     | 0.250405723 | -3.090443338 | 0.001998579 | 0.076647197 | 905         | 752         | 564          | 402         | 352          | 352          |
| Tribp2        | ENSMUSG000000029420  | 19.7610431   | -1.576168221   | 0.51061369  | -3.087485984 | 0.002018573 | 0.077251674 | 41          | 28          | 20           | 12          | 9            | 9            |
| Twist1        | ENSMUSG00000005799   | 355.4230231  | -1.336734407   | 0.427580655 | -3.085518339 | 0.002029959 | 0.077544889 | 128         | 127         | 335          | 518         | 478          | 750          |
| Hsf2          | ENSMUSG000000040612  | 254.9712438  | -1.35065547    | 0.438390651 | -3.080963289 | 0.00206332  | 0.078587487 | 489         | 472         | 138          | 169         | 145          | 172          |
| Hsf11         | ENSMUSG000000022769  | 550.3119691  | -0.687412437   | 0.223148157 | -3.080520336 | 0.002066932 | 0.078587487 | 627         | 786         | 624          | 365         | 379          | 521          |
| Pim1          | ENSMUSG000000024014  | 742.7542754  | 0.817899342    | 0.266090026 | 3.073769254  | 0.002113729 | 0.080220611 | 433         | 635         | 545          | 1251        | 756          | 836          |
| Ankrd9        | ENSMUSG000000037904  | 209.5628369  | 0.68466335     | 0.223213241 | 3.06730617   | 0.002159975 | 0.081805695 | 136         | 150         | 197          | 255         | 243          | 278          |
| Gpr22         | ENSMUSG000000040467  | 33.04902264  | -1.292446566   | 0.412588226 | -3.065660959 | 0.002171894 | 0.082086816 | 66          | 34          | 40           | 22          | 16           | 20           |
| Prr11         | ENSMUSG000000054776  | 114.6648428  | -0.945911996   | 0.308093738 | -3.052354075 | 0.002196035 | 0.082827733 | 129         | 113         | 211          | 72          | 81           | 97           |
| Cyfl1         | ENSMUSG000000025545  | 336.160445   | 0.528260617    | 0.172538932 | 3.061689883  | 0.002209917 | 0.082827733 | 275         | 280         | 271          | 389         | 363          | 439          |
| Silc2a1       | ENSMUSG000000028645  | 1081.289691  | -0.504800047   | 0.165137889 | -3.056839656 | 0.002236839 | 0.084019537 | 1294        | 1235        | 1276         | 1027        | 840          | 816          |
| Ahrgef2       | ENSMUSG000000028059  | 528.9286835  | -0.558582848   | 0.182864344 | -3.05449513  | 0.002254397 | 0.084019537 | 700         | 661         | 528          | 437         | 429          | 418          |
| Col4a6        | ENSMUSG000000031273  | 40.20626289  | -1.531630573   | 0.50171996  | -3.052768093 | 0.002267465 | 0.084744166 | 91          | 59          | 29           | 14          | 28           | 14           |
| Btrn9         | ENSMUSG000000040283  | 1606.910473  | -0.95539984    | 0.162343422 | -3.052418011 | 0.002270057 | 0.084744166 | 1744        | 2145        | 1752         | 1285        | 1395         | 1320         |
| Frr2          | ENSMUSG000000030251  | 794.79430774 | -0.96482026    | 0.303498756 | -3.049893537 | 0.002295957 | 0.085658467 | 156         | 158         | 294          | 328         | 385          | 266          |
| Gm6899        | ENSMUSG000000102496  | 16.95629486  | 1.548212581    | 0.508036404 | 3.047444416  | 0.002307964 | 0.085775618 | 11          | 7           | 8            | 20          | 27           | 29           |
| Unc5b         | ENSMUSG000000055667  | 59.71456497  | -1.388013663   | 0.455542411 | -3.046947178 | 0.002311783 | 0.085775618 | 142         | 72          | 45           | 35          | 36           | 28           |
| Clmp          | ENSMUSG000000032024  | 97.52784634  | -1.06506613    | 0.349759899 | -3.045142977 | 0.002326697 | 0.086116834 | 105         | 99          | 193          | 52          | 63           | 74           |
| Galm14        | ENSMUSG000000024064  | 13.49060295  | -1.815997785   | 0.596827796 | -3.042750014 | 0.00234427  | 0.086582311 | 22          | 15          | 26           | 8           | 6            | 4            |
| Aldh18a1      | ENSMUSG000000025007  | 587.8030778  | -0.604322749   | 0.196639897 | -3.042303985 | 0.002347754 | 0.086582311 | 746         | 797         | 584          | 417         | 498          | 484          |
| Fcd1          | ENSMUSG000000032051  | 513.0102774  | 0.874723039    | 0.297517407 | 3.041271295  | 0.002358002 | 0.086601498 | 2635        | 4338        | 3953         | 6225        | 4866         | 8761         |
| Kazalid       | ENSMUSG000000025213  | 183.774416   | -1.257205705   | 0.415322927 | -3.041000869 | 0.002359932 | 0.086601498 | 165         | 232         | 381          | 78          | 81           | 101          |
| Digp1         | ENSMUSG0000000303279 | 1546.16042   | -0.44706297    | 0.147043869 | -3.040417259 | 0.0         |             |             |             |              |             |              |              |

Table S5. Genes differentially expressed in ABC Male vs ABC Female

| Gene          | ENSEMBL_Gene_ID    | baseMean    | log2FoldChange | lfcSE       | stat        | pvalue      | padj        | Read count |           |           |           |           |           |           |  |
|---------------|--------------------|-------------|----------------|-------------|-------------|-------------|-------------|------------|-----------|-----------|-----------|-----------|-----------|-----------|--|
|               |                    |             |                |             |             |             |             | 166836_No  | 166838_No | 182098_Tu | 184208_Tu | 183159_Ba | 8505_Norm | 207386_No |  |
| Ddx3y         | ENSMUSG00000069045 | 1046.84874  | 12.23680254    | 1.023642768 | 11.95417281 | 6.17453E-33 | 3.9801E-29  | 2451       | 2744      | 2130      | 1         | 0         | 0         | 1         |  |
| Eif2s3y       | ENSMUSG00000069049 | 398.4463562 | 11.55675408    | 1.067877975 | 10.82216728 | 2.70309E-27 | 1.30681E-23 | 818        | 866       | 1105      | 0         | 0         | 1         | 0         |  |
| Drd4          | ENSMUSG00000025496 | 54.5839791  | 7.336438255    | 1.064060904 | 6.894754078 | 5.39581E-12 | 6.13789E-09 | 50         | 79        | 249       | 1         | 3         | 0         | 0         |  |
| Gm29650       | ENSMUSG00000099876 | 11.55831114 | 1.710987222    | 1.187473369 | 6.038861511 | 1.55205E-09 | 1.00045E-06 | 22         | 24        | 35        | 0         | 0         | 0         | 0         |  |
| Sud3          | ENSMUSG00000021384 | 769.1439318 | 4.644435614    | 0.556861731 | 8.322418751 | 6.81862E-17 | 1.51515E-13 | 1322       | 1717      | 2668      | 45        | 158       | 43        | 30        |  |
| Kdm5d         | ENSMUSG00000056673 | 284.7519157 | 4.423946895    | 0.33653877  | 13.14543014 | 1.80775E-39 | 3.49582E-35 | 767        | 608       | 500       | 21        | 41        | 29        | 26        |  |
| Uty           | ENSMUSG00000068457 | 338.1005811 | 4.15321738     | 0.832168958 | 4.990834301 | 0.01191E-07 | 0.000181653 | 908        | 723       | 570       | 14        | 132       | 11        | 10        |  |
| 4930438A08Rik | ENSMUSG00000069873 | 12.3566045  | 3.727209382    | 0.757595106 | 4.917970735 | 8.66368E-07 | 0.00024638  | 27         | 34        | 17        | 4         | 1         | 2         | 1         |  |
| Aldh1l2       | ENSMUSG00000020256 | 51.41029936 | 3.627532669    | 0.743368908 | 4.879855252 | 1.06164E-06 | 0.000293285 | 161        | 151       | 14        | 9         | 5         | 11        | 10        |  |
| Cowp2a        | ENSMUSG00000030785 | 33.40694447 | 3.256909082    | 0.651811756 | 4.996701961 | 5.83191E-07 | 0.000179012 | 66         | 104       | 34        | 4         | 16        | 7         | 3         |  |
| Cacnb4        | ENSMUSG00000017412 | 26.70626031 | 3.186838369    | 0.579601553 | 5.498326143 | 3.83413E-08 | 1.75172E-05 | 47         | 74        | 41        | 6         | 12        | 5         | 2         |  |
| Tnn           | ENSMUSG00000026725 | 50.75434258 | 3.168358092    | 0.747366309 | 4.239364355 | 2.24154E-05 | 0.004291764 | 73         | 162       | 75        | 8         | 8         | 28        | 1         |  |
| Lrn2          | ENSMUSG00000026822 | 15.93920059 | 3.068115533    | 0.730132013 | 4.202138078 | 2.64406E-05 | 0.004734332 | 35         | 43        | 18        | 0         | 5         | 5         | 5         |  |
| Pagr5         | ENSMUSG00000032278 | 150.0284161 | 2.921961595    | 0.507390439 | 5.758803027 | 8.47125E-09 | 4.55047E-06 | 259        | 329       | 304       | 64        | 55        | 26        | 13        |  |
| Trih3         | ENSMUSG00000032715 | 153.4450361 | 2.913239444    | 0.441426426 | 6.599603637 | 4.12258E-11 | 4.19592E-08 | 365        | 410       | 138       | 38        | 31        | 42        | 51        |  |
| Knk1          | ENSMUSG00000033998 | 669.670387  | 2.848493889    | 0.304245709 | 9.363975577 | 7.67919E-21 | 1.65E-17    | 1204       | 1377      | 1374      | 236       | 211       | 168       | 118       |  |
| 4632428C04Rik | ENSMUSG00000097184 | 14.0534001  | 2.797561128    | 0.617143972 | 4.533076968 | 5.81306E-06 | 0.001405162 | 19         | 35        | 28        | 3         | 4         | 6         | 3         |  |
| Bhlha15       | ENSMUSG00000052271 | 58.72151174 | 2.704404621    | 0.581638533 | 4.649631119 | 3.32529E-06 | 0.000835123 | 129        | 169       | 44        | 11        | 9         | 20        | 29        |  |
| Gsta3         | ENSMUSG00000025934 | 329.2782076 | 2.684706562    | 0.347617508 | 7.723162681 | 1.13478E-14 | 1.68803E-11 | 652        | 613       | 643       | 84        | 160       | 84        | 69        |  |
| 1520401A03Rik | ENSMUSG00000043747 | 7.517464613 | 2.563030032    | 0.783517234 | 3.271185265 | 0.001070977 | 0.073950605 | 12         | 16        | 4         | 0         | 2         | 3         | 3         |  |
| Adcy8         | ENSMUSG00000022376 | 70.49321408 | 2.505202727    | 0.408562646 | 6.131746878 | 8.69193E-10 | 6.22535E-07 | 141        | 170       | 90        | 24        | 13        | 31        | 24        |  |
| 9330159F19Rik | ENSMUSG00000040360 | 266.5886506 | 2.482105194    | 0.553758741 | 4.48228626  | 7.38476E-06 | 0.001704018 | 544        | 430       | 534       | 154       | 48        | 128       | 28        |  |
| Gdf15         | ENSMUSG00000038508 | 60.50482018 | 2.399121087    | 0.446222178 | 5.376516914 | 7.59406E-06 | 3.05946E-05 | 124        | 154       | 60        | 27        | 24        | 19        | 16        |  |
| Adamt8        | ENSMUSG00000031994 | 31.72002932 | 2.396547243    | 0.642801487 | 3.728285156 | 0.000192787 | 0.022458543 | 38         | 84        | 56        | 8         | 1         | 16        | 19        |  |
| Tubb3         | ENSMUSG00000062380 | 451.4934974 | 2.321252971    | 0.439600826 | 5.286859663 | 1.24434E-07 | 4.62751E-05 | 508        | 742       | 1246      | 212       | 82        | 192       | 179       |  |
| Pdgr1         | ENSMUSG00000031595 | 77.37931562 | 2.227076981    | 0.297367842 | 7.489300007 | 6.92419E-14 | 9.82667E-11 | 135        | 138       | 148       | 26        | 33        | 34        | 26        |  |
| Derl3         | ENSMUSG00000090092 | 49.72859925 | 2.06477907     | 0.589372336 | 3.503353136 | 0.00045944  | 0.043150363 | 87         | 130       | 48        | 18        | 8         | 42        | 16        |  |
| Foxo6         | ENSMUSG00000052135 | 36.36172752 | 1.968767633    | 0.619807995 | 3.180146516 | 0.001472006 | 0.092121855 | 27         | 51        | 112       | 15        | 8         | 13        | 29        |  |
| 4331414D18Rik | ENSMUSG00000034959 | 45.52840953 | 1.917700445    | 0.368056594 | 5.210341232 | 1.88494E-07 | 6.62744E-05 | 70         | 66        | 100       | 21        | 16        | 22        | 23        |  |
| Grin2d        | ENSMUSG00000002771 | 47.85536355 | 1.915363823    | 0.559583    | 3.422841332 | 0.000619702 | 0.0528984   | 36         | 64        | 148       | 31        | 15        | 23        | 18        |  |
| Prr35         | ENSMUSG00000033491 | 7597.575661 | 1.830608125    | 0.295724572 | 6.190246935 | 6.007E-10   | 4.68414E-07 | 12741      | 14450     | 11492     | 4003      | 2658      | 2969      | 4871      |  |
| Ampd3         | ENSMUSG00000050686 | 342.1663572 | 1.757962229    | 0.409125643 | 4.296876176 | 1.73222E-05 | 0.003453366 | 536        | 485       | 698       | 196       | 71        | 211       | 198       |  |
| Git8d2        | ENSMUSG00000020251 | 151.4439101 | 1.754613681    | 0.400864129 | 4.370778521 | 1.20281E-05 | 0.00254497  | 200        | 363       | 198       | 58        | 51        | 109       | 82        |  |
| Tskru         | ENSMUSG00000049580 | 291.3594715 | 1.747530708    | 0.408062399 | 4.282508992 | 1.84798E-05 | 0.003632998 | 451        | 535       | 473       | 70        | 215       | 182       | 113       |  |
| Fgf11         | ENSMUSG00000042826 | 270.3718814 | 1.727687771    | 0.323180877 | 5.345884901 | 8.99746E-08 | 3.47993E-05 | 364        | 478       | 508       | 197       | 103       | 119       | 124       |  |
| Acan          | ENSMUSG00000033067 | 2627.371611 | 1.69465377     | 0.439611351 | 3.854890841 | 0.000115781 | 0.0150267   | 623        | 5170      | 3733      | 2343      | 632       | 1081      | 1308      |  |
| Prrg3         | ENSMUSG00000033361 | 3226.380308 | 1.64245984     | 0.508820794 | 3.227973107 | 0.001246707 | 0.08172481  | 6570       | 7038      | 2218      | 1914      | 722       | 2371      | 1751      |  |
| Jam2          | ENSMUSG00000053062 | 815.5511485 | 1.63592875     | 0.271365031 | 6.028517166 | 1.65471E-09 | 1.03222E-06 | 1244       | 1671      | 1080      | 489       | 356       | 479       | 389       |  |
| Chac1         | ENSMUSG00000027313 | 66.34990642 | 1.626814943    | 0.39461149  | 4.122573682 | 3.74663E-05 | 0.006245886 | 125        | 120       | 80        | 37        | 20        | 33        | 50        |  |
| Hhex          | ENSMUSG00000024986 | 910.2269489 | 1.544843719    | 0.384229252 | 4.020636101 | 5.80427E-05 | 0.008710011 | 1286       | 1424      | 1663      | 258       | 456       | 521       | 764       |  |
| Zbtb16        | ENSMUSG00000066687 | 114.7796148 | 1.538822023    | 0.351868901 | 4.37282263  | 1.22392E-05 | 0.00254497  | 256        | 156       | 148       | 48        | 74        | 48        | 48        |  |
| Spag          | ENSMUSG00000026207 | 184.8488817 | 1.533969187    | 0.249712489 | 6.142941402 | 8.10072E-10 | 6.02506E-07 | 290        | 311       | 284       | 93        | 127       | 101       | 88        |  |
| Pdp1          | ENSMUSG00000049225 | 2641.631006 | 1.507077469    | 0.225806227 | 6.67420687  | 2.48573E-11 | 2.6705E-08  | 4488       | 4097      | 4004      | 1526      | 1263      | 1795      | 1318      |  |
| Zfp69         | ENSMUSG00000064141 | 39.83588766 | 1.475748177    | 0.431881935 | 3.417017608 | 0.000633112 | 0.053697881 | 46         | 49        | 94        | 25        | 16        | 25        | 24        |  |
| Shh           | ENSMUSG00000026233 | 7053.141673 | 1.468141294    | 0.412956635 | 3.555194833 | 0.000376999 | 0.038036067 | 7996       | 8717      | 16604     | 6033      | 2429      | 4147      | 3446      |  |
| Ppp13b        | ENSMUSG00000046794 | 125.275267  | 1.452688477    | 0.354097683 | 4.102507713 | 4.08696E-05 | 0.006687622 | 216        | 236       | 139       | 70        | 51        | 66        | 100       |  |
| Pitpm3        | ENSMUSG00000040543 | 41.22092005 | 1.41782774     | 0.433615105 | 3.269783969 | 0.001076296 | 0.073950605 | 72         | 78        | 43        | 33        | 17        | 28        | 17        |  |
| Penk          | ENSMUSG00000045573 | 124.4538138 | 1.399609794    | 0.341292807 | 4.100962212 | 4.11535E-05 | 0.006687622 | 220        | 146       | 211       | 50        | 90        | 64        | 90        |  |
| Star5         | ENSMUSG00000046027 | 325.4734983 | 1.391621343    | 0.244508343 | 5.691508614 | 1.25923E-08 | 6.40809E-06 | 474        | 437       | 599       | 170       | 207       | 179       | 212       |  |
| Maf2          | ENSMUSG00000015222 | 423.8694955 | 1.38128227     | 0.436264312 | 3.166159212 | 0.001544662 | 0.09482755  | 743        | 806       | 415       | 338       | 112       | 310       | 244       |  |
| Nsp3          | ENSMUSG00000024664 | 266.2092801 | 1.366824238    | 0.415621029 | 3.288631308 | 0.001006758 | 0.07061468  | 430        | 522       | 276       | 140       | 95        | 141       | 260       |  |
| Amotl1        | ENSMUSG00000013076 | 3306.572111 | 1.298425647    | 0.392591964 | 3.30731591  | 0.000941946 | 0.068222291 | 5718       | 6185      | 3104      | 2363      | 2778      | 1813      | 1184      |  |
| Igfb8         | ENSMUSG00000025321 | 361.579721  | 1.288410095    | 0.376475816 | 3.422294406 | 0.00062095  | 0.0528984   | 643        | 561       | 434       | 300       | 127       | 288       | 178       |  |
| Mmp24         | ENSMUSG00000027612 | 114.3352986 | 1.286583568    | 0.346668059 | 3.71128385  | 0.000206211 | 0.023595874 | 177        | 230       | 111       | 68        | 72        | 83        | 60        |  |
| Tro           | ENSMUSG00000025272 | 192.9562521 | 1.280605083    | 0.364774934 | 3.510671822 | 0.000446976 | 0.042579403 | 374        | 332       | 165       | 111       | 152       | 105       | 111       |  |
| Hivep3        | ENSMUSG00000028634 | 271.0569464 | 1.274498075    | 0.30313384  | 4.204407119 | 2.61767E-05 | 0.004734332 | 447        | 444       | 332       | 170       | 231       | 141       | 132       |  |
| Hnr3a         | ENSMUSG00000032269 | 229.0798043 | 1.271010657    | 0.374596358 | 3.390139121 | 0.000691281 | 0.056885093 | 286        | 353       | 395       | 114       | 131       | 230       | 95        |  |
| Kcnk3         | ENSMUSG00000062785 | 36.3853384  | 1.269830853    | 0.382055788 | 3.323679144 | 0.000883883 | 0.065570835 | 49         | 64        | 50        | 20        | 31        | 24        | 20        |  |
| Cers6         | ENSMUSG00000027035 | 81.4612258  | 1.264629263    | 0.386108575 | 3.275320326 | 0.00105422  | 0.073681429 | 107        | 181       | 79        | 54        | 55        | 55        | 40        |  |
| Scla11        | ENSMUSG00000047996 | 88.99215241 | 1.249593755    | 0.299600503 | 4.170033827 | 3.04549E-05 | 0.005403092 | 103        | 166       | 130       | 54        | 57        | 56        | 57        |  |
| Mnana1        | ENSMUSG00000042763 | 266.7406834 | 1.246401434    | 0.361526378 | 3.447608555 | 0.000565573 | 0.049940877 | 394        | 473       | 329       | 128       | 112       | 178       | 253       |  |
| Smarca1       | ENSMUSG00000031099 | 1112.89876  | 1.216569304    | 0.313872628 | 3.875996808 | 0.000106189 | 0.013969281 | 2050       | 1826      | 1074      | 834       | 721       | 731       | 554       |  |
| Ulf3          | ENSMUSG00000054263 | 1052.650117 | 1.194167183    | 0.326104203 | 3.661919012 | 0.000250333 | 0.027355237 | 1753       | 1857      | 1046      | 864       | 488       | 648       | 712       |  |
| Adamt4        | ENSMUSG00000015850 | 100.5890668 | 1.182641227    | 0.351251656 | 3.36934241  | 0.000760088 | 0.059750341 | 129        | 163       | 152       | 80        | 36        | 65        | 79        |  |
| Mpp3          | ENSMUSG00000052373 | 103.8797507 | 1.171005225    | 0.282430885 | 4.146165619 | 3.38089E-05 | 0.005837474 | 152        | 139       | 166       | 68        | 67        | 83        | 53        |  |
| Atf5          | ENSMUSG00000038539 | 1329.517493 | 1.161333104    | 0.335401354 | 3.46251227  | 0.000351558 | 0.048359234 | 1931       | 2566      | 1333      | 685       | 1112      | 698       | 981       |  |
| 2010077H06Rik | ENSMUSG00000044694 | 311.9276151 | 1.160570496    | 0.29138124  |             |             |             |            |           |           |           |           |           |           |  |

Table S5. Genes differentially expressed in ABC Male vs ABC Female

| Gene         | ENSEMBL_Gene_ID      | baseMean    | log2FoldChange | lfcSE       | stat         | pvalue      | padj        | Read count |           |           |           |           |           |           |  |
|--------------|----------------------|-------------|----------------|-------------|--------------|-------------|-------------|------------|-----------|-----------|-----------|-----------|-----------|-----------|--|
|              |                      |             |                |             |              |             |             | 166836_No  | 166838_No | 182098_Tu | 184208_Tu | 183159_Bs | 8505_Norm | 207286_No |  |
| S930412G12Rk | ENSMUSG00000027591   | 319.1366747 | -0.949088398   | 0.286609444 | -3.311434496 | 0.00092819  | 0.067478691 | 214        | 169       | 242       | 491       | 434       | 383       | 300       |  |
| Opn3         | ENSMUSG000000026526  | 386.3840882 | -0.95362147    | 0.281341218 | -3.388633039 | 0.000702419 | 0.05731387  | 290        | 288       | 177       | 532       | 409       | 527       | 481       |  |
| Shtn1        | ENSMUSG000000041362  | 405.8820789 | -0.958357908   | 0.222406826 | -4.309031009 | 1.63971E-05 | 0.003337767 | 285        | 281       | 226       | 550       | 455       | 497       | 548       |  |
| Spint2       | ENSMUSG000000074227  | 2218.808353 | -0.963194831   | 0.286503753 | -3.361892543 | 0.000774102 | 0.06036126  | 1110       | 1408      | 1797      | 2324      | 3493      | 2416      | 2984      |  |
| Fam110b      | ENSMUSG000000049119  | 173.952517  | -0.963408713   | 0.251511173 | -3.830480781 | 0.000127893 | 0.016151143 | 120        | 115       | 104       | 253       | 203       | 237       | 185       |  |
| Tacc3        | ENSMUSG000000037313  | 163.9177864 | -0.975009148   | 0.303239179 | -3.215313907 | 0.001303019 | 0.083713591 | 121        | 103       | 92        | 238       | 253       | 149       | 192       |  |
| Zfp385a      | ENSMUSG000000005512  | 730.6092465 | -0.976267955   | 0.217829809 | -4.481792272 | 7.1408E-06  | 0.001704018 | 448        | 452       | 510       | 936       | 1075      | 787       | 906       |  |
| Skap1        | ENSMUSG000000057058  | 558.7795622 | -0.998871677   | 0.255905379 | -3.903285197 | 9.48958E-05 | 0.012743711 | 363        | 377       | 327       | 663       | 918       | 576       | 688       |  |
| Mtpp         | ENSMUSG000000028158  | 137.0157084 | -0.999828146   | 0.262945066 | -3.802422163 | 0.000143288 | 0.017762237 | 98         | 84        | 80        | 205       | 159       | 153       | 180       |  |
| Actg1        | ENSMUSG000000062825  | 21639.2174  | -1.002721997   | 0.211796739 | -4.734359932 | 2.19747E-06 | 0.000566597 | 12506      | 15143     | 13605     | 23615     | 31944     | 27382     | 27280     |  |
| Cdca7        | ENSMUSG000000056122  | 69.90376322 | -1.039467943   | 0.312609392 | -3.325133437 | 0.000883762 | 0.065570835 | 45         | 38        | 48        | 114       | 84        | 81        | 79        |  |
| Cadm1        | ENSMUSG000000032076  | 1698.050422 | -1.066350123   | 0.265536171 | -4.015837542 | 5.92351E-05 | 0.008811442 | 1069       | 976       | 1089      | 2882      | 2063      | 2156      | 1651      |  |
| Ndrp2        | ENSMUSG00000004558   | 2671.181103 | -1.082476522   | 0.336268151 | -3.219087264 | 0.001285993 | 0.083172378 | 1528       | 1378      | 1983      | 2465      | 5210      | 3035      | 3099      |  |
| Rumx2        | ENSMUSG000000039153  | 115.684876  | -1.095542545   | 0.323169889 | -3.389997885 | 0.000698932 | 0.057270932 | 75         | 58        | 77        | 122       | 210       | 137       | 131       |  |
| Mocos        | ENSMUSG000000039616  | 453.1324143 | -1.100357891   | 0.326652696 | -3.368588592 | 0.000755547 | 0.089635756 | 338        | 244       | 241       | 638       | 782       | 545       | 385       |  |
| Hmgcn2       | ENSMUSG00000003038   | 1120.513022 | -1.120323826   | 0.342979646 | -3.266444054 | 0.001089073 | 0.074418723 | 578        | 496       | 937       | 1133      | 1882      | 1172      | 1644      |  |
| Cd24a        | ENSMUSG000000047139  | 1975.508646 | -1.121037464   | 0.336667649 | -3.329804529 | 0.000689007 | 0.065139807 | 1293       | 1291      | 962       | 3213      | 2571      | 3023      | 1476      |  |
| 6030419C18Rk | ENSMUSG000000066607  | 146.0549978 | -1.125807903   | 0.32977766  | -3.413839205 | 0.000640544 | 0.054090976 | 77         | 73        | 111       | 167       | 250       | 141       | 203       |  |
| Slain1       | ENSMUSG0000000055717 | 213.2783737 | -1.155338692   | 0.294941675 | -3.917176823 | 8.9592E-05  | 0.012287452 | 138        | 97        | 142       | 291       | 211       | 343       | 271       |  |
| Tubb6        | ENSMUSG000000001473  | 1171.653918 | -1.18940555    | 0.373297306 | -3.186215194 | 0.001441473 | 0.090798735 | 807        | 667       | 555       | 1317      | 1723      | 870       | 2262      |  |
| Sema5a       | ENSMUSG00000002231   | 1014.235419 | -1.197500495   | 0.345278909 | -3.468212111 | 0.000523934 | 0.047791638 | 697        | 535       | 519       | 1605      | 901       | 1848      | 996       |  |
| Ica11        | ENSMUSG000000026018  | 32.28923334 | -1.19817087    | 0.36946706  | -3.242970751 | 0.00182904  | 0.078744991 | 19         | 17        | 19        | 44        | 36        | 44        | 46        |  |
| Cspg5        | ENSMUSG000000032482  | 1469.532261 | -1.241490791   | 0.34377026  | -3.611396725 | 0.000304552 | 0.031494297 | 863        | 767       | 846       | 1795      | 3099      | 1450      | 1466      |  |
| Dusp5        | ENSMUSG000000034765  | 137.466031  | -1.249090096   | 0.314010849 | -3.9778565   | 6.95393E-05 | 0.009961121 | 72         | 83        | 76        | 124       | 172       | 220       | 215       |  |
| Lipa         | ENSMUSG000000024781  | 3820.166664 | -1.251554921   | 0.345312941 | -3.624407817 | 0.000289624 | 0.030218402 | 2240       | 2526      | 1641      | 3818      | 3493      | 6841      | 6183      |  |
| Chaf1b       | ENSMUSG000000022945  | 76.6893586  | -1.255356235   | 0.390770875 | -3.212512513 | 0.001315794 | 0.084254396 | 51         | 30        | 48        | 119       | 118       | 61        | 111       |  |
| Nct19        | ENSMUSG000000036902  | 152.7197179 | -1.262868823   | 0.396154234 | -3.187819594 | 0.001433499 | 0.090591543 | 79         | 85        | 91        | 266       | 98        | 255       | 195       |  |
| Lrrn1        | ENSMUSG000000034648  | 1114.383769 | -1.272944181   | 0.386146497 | -3.295247545 | 0.00097889  | 0.070062954 | 787        | 680       | 381       | 1699      | 844       | 1849      | 1561      |  |
| Utm2a        | ENSMUSG00000001239   | 105.0650611 | -1.282452128   | 0.386793092 | -3.315602693 | 0.000914457 | 0.066731232 | 70         | 52        | 50        | 79        | 178       | 177       | 129       |  |
| Fbln1        | ENSMUSG000000006369  | 4019.559425 | -1.299757973   | 0.307524869 | -4.226513376 | 2.3734E-05  | 0.00449969  | 2630       | 2294      | 1647      | 7133      | 4147      | 5746      | 4541      |  |
| Cenpa        | ENSMUSG000000029177  | 103.0741877 | -1.329454857   | 0.390886446 | -3.401128052 | 0.000671084 | 0.055937152 | 61         | 60        | 45        | 137       | 206       | 81        | 132       |  |
| Pak1         | ENSMUSG000000030774  | 407.0365893 | -1.329947739   | 0.26779558  | -4.966279655 | 6.82495E-07 | 0.000203048 | 233        | 218       | 205       | 699       | 437       | 586       | 471       |  |
| Rads1        | ENSMUSG000000027323  | 60.49966207 | -1.353393813   | 0.426117919 | -3.176101621 | 0.001492687 | 0.093101751 | 29         | 38        | 29        | 131       | 70        | 52        | 74        |  |
| Man1a        | ENSMUSG000000003746  | 500.0094602 | -1.359843321   | 0.405632666 | -3.352379427 | 0.00080120  | 0.061974524 | 285        | 281       | 226       | 345       | 584       | 689       | 1090      |  |
| Tmem132a     | ENSMUSG000000024736  | 514.7244057 | -1.388574292   | 0.402652273 | -3.448569359 | 0.000563565 | 0.049940877 | 303        | 288       | 210       | 389       | 1036      | 510       | 866       |  |
| Dlgap5       | ENSMUSG000000037544  | 47.93097834 | -1.398117705   | 0.415800112 | -3.36247554  | 0.00077247  | 0.06036126  | 30         | 24        | 20        | 79        | 86        | 40        | 57        |  |
| Pla2g2f      | ENSMUSG000000028749  | 528.5872363 | -1.41696053    | 0.407219338 | -3.479600298 | 0.000502162 | 0.04624198  | 259        | 384       | 169       | 589       | 886       | 967       | 446       |  |
| Cdck1c       | ENSMUSG000000037664  | 7443.987207 | -1.417597972   | 0.440767791 | -3.21620096  | 0.001298998 | 0.083713591 | 2778       | 3558      | 5086      | 5146      | 14666     | 7090      | 13783     |  |
| Adm5         | ENSMUSG000000031554  | 29.66136183 | -1.419464127   | 0.430848856 | -3.294575596 | 0.000985704 | 0.070079225 | 20         | 12        | 13        | 35        | 53        | 34        | 40        |  |
| Efnas5       | ENSMUSG000000048915  | 221.2697193 | -1.424518045   | 0.364232825 | -3.911009514 | 9.19112E-05 | 0.012516745 | 83         | 108       | 147       | 333       | 416       | 261       | 201       |  |
| Gna11        | ENSMUSG000000057614  | 552.6832287 | -1.424865593   | 0.332828563 | -4.281079665 | 1.85899E-05 | 0.00362998  | 385        | 299       | 161       | 757       | 773       | 767       | 728       |  |
| Rbm24        | ENSMUSG000000038132  | 4565.054604 | -1.443616081   | 0.329674828 | -4.378909033 | 1.19275E-05 | 0.00254497  | 2186       | 2554      | 2167      | 8063      | 3793      | 7778      | 5414      |  |
| Z101417H13Rk | ENSMUSG000000040204  | 70.81637147 | -1.444038613   | 0.427159664 | -3.80559387  | 0.000723384 | 0.058044845 | 35         | 33        | 39        | 113       | 123       | 45        | 108       |  |
| Ccn1         | ENSMUSG000000002068  | 54.58368896 | -1.444661106   | 0.356068352 | -4.057257818 | 4.96523E-05 | 0.00774335  | 30         | 31        | 22        | 96        | 59        | 67        | 77        |  |
| Ube2c        | ENSMUSG000000001403  | 116.2533301 | -1.44641318    | 0.45775553  | -3.159794009 | 0.001578807 | 0.096617004 | 52         | 49        | 75        | 179       | 227       | 65        | 166       |  |
| Car8         | ENSMUSG0000000041261 | 68.16964762 | -1.446473761   | 0.347246669 | -4.165551153 | 3.10601E-05 | 0.00546037  | 32         | 31        | 41        | 80        | 78        | 90        | 127       |  |
| Pknox1       | ENSMUSG000000029053  | 170.1708166 | -1.44975277    | 0.408209074 | -3.551495696 | 0.000383048 | 0.038182408 | 109        | 88        | 60        | 328       | 238       | 245       | 123       |  |
| Prid1        | ENSMUSG000000045658  | 3544.42227  | -1.452348997   | 0.403025025 | -3.603619884 | 0.000313816 | 0.032279638 | 2099       | 1483      | 1755      | 5623      | 2089      | 5834      | 5927      |  |
| Rspg1        | ENSMUSG000000024033  | 128.3162066 | -1.457102518   | 0.401957274 | -3.625019412 | 0.000288941 | 0.030218402 | 84         | 44        | 65        | 111       | 175       | 158       | 267       |  |
| Par1p        | ENSMUSG000000003565  | 35.90603645 | -1.461106099   | 0.439483727 | -3.324596858 | 0.000885466 | 0.065570835 | 19         | 17        | 17        | 77        | 44        | 38        | 38        |  |
| Cdk1         | ENSMUSG000000019942  | 176.8608331 | -1.468324943   | 0.391010213 | -3.755208675 | 0.000173197 | 0.020547766 | 90         | 76        | 97        | 312       | 277       | 118       | 268       |  |
| Etv4         | ENSMUSG000000017724  | 162.6402483 | -1.468713891   | 0.387045466 | -3.794680518 | 0.000147834 | 0.018208968 | 90         | 81        | 72        | 224       | 348       | 195       | 129       |  |
| Rfbp3        | ENSMUSG000000025576  | 237.3503219 | -1.470473288   | 0.439380745 | -3.346694879 | 0.000817812 | 0.062509262 | 80         | 111       | 163       | 312       | 549       | 205       | 242       |  |
| Cdca8        | ENSMUSG000000028873  | 120.2738062 | -1.530180785   | 0.406273946 | -3.766376848 | 0.000165634 | 0.020018906 | 62         | 44        | 68        | 220       | 194       | 85        | 170       |  |
| Acot7        | ENSMUSG000000028937  | 937.6900933 | -1.534985662   | 0.377414133 | -4.0671123   | 4.75993E-05 | 0.00748354  | 448        | 509       | 393       | 1154      | 2168      | 853       | 1039      |  |
| Tk1          | ENSMUSG000000025574  | 92.48772311 | -1.538418464   | 0.438875773 | -3.505362019 | 0.000455987 | 0.043150363 | 59         | 30        | 45        | 179       | 95        | 77        | 164       |  |
| Lars2        | ENSMUSG000000035202  | 15574.33999 | -1.554442719   | 0.493167647 | -3.151955991 | 0.001621807 | 0.098315068 | 7448       | 7564      | 7162      | 8979      | 41139     | 13595     | 23133     |  |
| Gm37691      | ENSMUSG0000000104348 | 30.33635946 | -1.556370042   | 0.451669116 | -4.445819044 | 0.000569301 | 0.049942759 | 16         | 17        | 10        | 57        | 39        | 43        | 30        |  |
| Gm42528      | ENSMUSG0000000107134 | 118.0272115 | -1.562460027   | 0.348231952 | -4.486842749 | 7.22864E-06 | 0.001704018 | 75         | 55        | 37        | 171       | 146       | 137       | 206       |  |
| Klf23        | ENSMUSG000000032254  | 100.3888433 | -1.57300211    | 0.477292727 | -3.295675845 | 0.000981852 | 0.070062954 | 64         | 41        | 36        | 231       | 156       | 72        | 102       |  |
| Klf2c        | ENSMUSG000000028678  | 48.64894974 | -1.582422605   | 0.466082862 | -3.395152953 | 0.000685903 | 0.056683703 | 27         | 29        | 13        | 99        | 59        | 43        | 72        |  |
| Ptk          | ENSMUSG000000022033  | 136.8594079 | -1.587127904   | 0.424788957 | -3.736273924 | 0.000186767 | 0.021889117 | 87         | 55        | 49        | 103       | 148       | 118       | 197       |  |
| Hs3st1       | ENSMUSG000000051022  | 804.1151066 | -1.591384347   | 0.263078632 | -6.049082483 | 1.45673E-09 | 9.71388E-07 | 430        | 342       | 350       | 1068      | 870       | 1160      | 1408      |  |
| C1stn3       | ENSMUSG000000008153  | 214.2683954 | -1.593169908   | 0.39093414  | -4.075289784 | 4.59571E-05 | 0.007248574 | 120        | 106       | 73        | 305       | 174       | 446       | 275       |  |
| Hlfsn2       | ENSMUSG000000062184  | 274.8881146 | -1.605418655   | 0.366840354 | -4.376341471 | 1.20688E-05 | 0.00254497  | 144        | 115       | 121       | 426       | 579       | 253       | 287       |  |
| Cdca3        | ENSMUSG000000023505  | 13          |                |             |              |             |             |            |           |           |           |           |           |           |  |

Table S5. Genes differentially expressed in ABC Male vs ABC Female

| Gene          | ENSEMBL_Gene_ID      | baseMean    | log2FoldChange | lfcSE       | stat         | pvalue       | padj        | Read count |           |           |           |           |           |           |  |  |  |
|---------------|----------------------|-------------|----------------|-------------|--------------|--------------|-------------|------------|-----------|-----------|-----------|-----------|-----------|-----------|--|--|--|
|               |                      |             |                |             |              |              |             | 166836_No  | 166838_No | 182098_Tu | 184208_Tu | 183159_Ba | 8505_Norm | 207386_No |  |  |  |
| Emb           | ENSMUSG00000021728   | 155.8826013 | -1.869491062   | 0.513453283 | -3.641014919 | 0.000271565  | 0.029078694 | 82         | 45        | 59        | 74        | 215       | 285       | 332       |  |  |  |
| Kif22         | ENSMUSG00000030677   | 116.7549732 | -1.87577641    | 0.453142352 | -4.13948869  | 3.48081E-05  | 0.00956802  | 57         | 45        | 37        | 231       | 221       | 74        | 153       |  |  |  |
| Rem2          | ENSMUSG00000002176   | 14.01369658 | -1.89369038    | 0.582350243 | -3.252285135 | 0.001144811  | 0.077406846 | 8          | 4         | 13        | 27        | 17        | 21        | 21        |  |  |  |
| Ncapg         | ENSMUSG00000015880   | 50.83331488 | -1.897801749   | 0.540205372 | -3.511321577 | 0.000442875  | 0.042397587 | 31         | 16        | 13        | 119       | 56        | 36        | 85        |  |  |  |
| 100a10        | ENSMUSG000000041959  | 2051.755427 | -1.914076643   | 0.607987351 | -3.148217868 | 0.001642692  | 0.098906885 | 703        | 828       | 852       | 1137      | 7194      | 1337      | 2312      |  |  |  |
| Birc5         | ENSMUSG00000017716   | 97.31256043 | -1.93086711    | 0.510567521 | -3.781452272 | 0.000155916  | 0.01896293  | 35         | 35        | 42        | 125       | 267       | 60        | 118       |  |  |  |
| Ippp5j        | ENSMUSG000000034570  | 91.70348421 | -1.940385187   | 0.442572132 | -4.38433658  | 1.1634E-05   | 0.00254497  | 30         | 22        | 53        | 201       | 98        | 136       | 103       |  |  |  |
| Mycbpap       | ENSMUSG000000039110  | 29.52204944 | -1.982556933   | 0.590825575 | -3.355570605 | 0.000792014  | 0.061509935 | 16         | 4         | 13        | 36        | 72        | 25        | 40        |  |  |  |
| Gm24187       | ENSMUSG000000088609  | 453.0040442 | -1.98324731    | 0.544782099 | -3.640441408 | 0.000272171  | 0.029078694 | 146        | 167       | 192       | 204       | 1289      | 481       | 692       |  |  |  |
| Alyref2       | ENSMUSG000000060244  | 441.4298057 | -1.992852566   | 0.365340782 | -5.454777203 | 4.90343E-08  | 2.10717E-05 | 157        | 137       | 196       | 867       | 352       | 648       | 733       |  |  |  |
| Ppp1r14c      | ENSMUSG000000040653  | 33.95426671 | -1.999100748   | 0.545923548 | -3.661869427 | 0.000250381  | 0.027355237 | 14         | 7         | 16        | 25        | 40        | 63        | 72        |  |  |  |
| Mxd3          | ENSMUSG000000021485  | 45.57574093 | -2.008695854   | 0.523632198 | -3.836081624 | 0.000125013  | 0.015969121 | 23         | 11        | 16        | 106       | 72        | 31        | 59        |  |  |  |
| Crybb1        | ENSMUSG000000029343  | 66.87009272 | -2.009177723   | 0.576168758 | -3.4871341   | 0.000488226  | 0.04539098  | 23         | 17        | 33        | 53        | 193       | 46        | 104       |  |  |  |
| Mir6236       | ENSMUSG000000098973  | 1713.063451 | -2.027893119   | 0.558517443 | -3.630850108 | 0.000282489  | 0.029851238 | 639        | 570       | 654       | 783       | 5052      | 1484      | 2810      |  |  |  |
| Gm24270       | ENSMUSG000000076281  | 713.6372043 | -2.034749919   | 0.553328043 | -3.67729405  | 0.000235271  | 0.026502196 | 236        | 268       | 269       | 303       | 2048      | 721       | 1148      |  |  |  |
| Hist1h2ap     | ENSMUSG000000094777  | 110.003827  | -2.067450657   | 0.655266665 | -3.155128692 | 0.001604273  | 0.097557975 | 30         | 31        | 56        | 61        | 377       | 67        | 148       |  |  |  |
| Scara5        | ENSMUSG000000022032  | 105.9674828 | -2.067792976   | 0.563047735 | -3.672500302 | 0.000240189  | 0.026848395 | 64         | 36        | 12        | 102       | 255       | 132       | 140       |  |  |  |
| Gm24245       | ENSMUSG000000087943  | 448.185255  | -2.069268751   | 0.571070256 | -3.623492436 | 0.000290652  | 0.030218402 | 145        | 159       | 171       | 188       | 1346      | 438       | 690       |  |  |  |
| Shisa9        | ENSMUSG000000021494  | 140.3342313 | -2.07847188    | 0.467700406 | -4.443989519 | 8.3059E-06   | 0.002009011 | 65         | 32        | 50        | 352       | 107       | 188       | 188       |  |  |  |
| Adh1          | ENSMUSG000000074207  | 47241.2675  | -2.078579631   | 0.598304764 | -3.474115127 | 0.000512541  | 0.046974025 | 8318       | 6252      | 35293     | 39932     | 66282     | 74074     | 100538    |  |  |  |
| RP23-291B1.2  | ENSMUSG000000108434  | 36.73751222 | -2.082498913   | 0.608410613 | -3.422851064 | 0.00061968   | 0.0528984   | 12         | 6         | 21        | 79        | 76        | 25        | 39        |  |  |  |
| Serpinb1b     | ENSMUSG000000051029  | 254.6423568 | -2.09009775    | 0.617520043 | -3.384521357 | 0.000713025  | 0.057934756 | 104        | 43        | 120       | 606       | 80        | 395       | 434       |  |  |  |
| D630024D03Rik | ENSMUSG000000085772  | 49.04756164 | -2.097089417   | 0.650471761 | -3.223951513 | 0.001264348  | 0.082323107 | 15         | 16        | 19        | 22        | 123       | 33        | 114       |  |  |  |
| Fndc7         | ENSMUSG000000045326  | 39.76457286 | -2.099994661   | 0.415743677 | -5.051187974 | 4.39071E-07  | 0.000143911 | 20         | 12        | 9         | 56        | 66        | 52        | 64        |  |  |  |
| Gm25911       | ENSMUSG000000088246  | 239.1612745 | -2.111669712   | 0.577107488 | -3.659057896 | 0.000253144  | 0.027501694 | 85         | 80        | 82        | 105       | 753       | 248       | 321       |  |  |  |
| Cenpm         | ENSMUSG000000068101  | 40.6497048  | -2.13151597    | 0.480061531 | -4.440089097 | 8.99216E-06  | 0.002021982 | 13         | 13        | 15        | 64        | 84        | 29        | 66        |  |  |  |
| Naip5         | ENSMUSG000000071203  | 117.3526326 | -2.140966332   | 0.445596734 | -4.804712787 | 1.5497E-06   | 0.000416224 | 48         | 38        | 33        | 74        | 226       | 205       | 197       |  |  |  |
| Gm23935       | ENSMUSG000000076258  | 2305.92874  | -2.173982613   | 0.644946016 | -3.370797801 | 0.000749508  | 0.059401619 | 633        | 727       | 920       | 915       | 8354      | 1697      | 2875      |  |  |  |
| Dmer          | ENSMUSG000000036766  | 168.3174876 | -2.217798379   | 0.426801021 | -5.19632866  | 2.02362E-07  | 7.0191E-05  | 86         | 30        | 42        | 312       | 182       | 190       | 331       |  |  |  |
| Fam194a       | ENSMUSG000000046500  | 164.3353684 | -2.228942376   | 0.439185443 | -5.075173623 | 3.87142E-07  | 0.000129079 | 41         | 73        | 45        | 337       | 336       | 184       | 136       |  |  |  |
| Ush1g         | ENSMUSG000000045288  | 11.8689791  | -2.230086498   | 0.691576289 | -3.224647294 | 0.001261299  | 0.082323107 | 3          | 5         | 4         | 14        | 15        | 30        | 13        |  |  |  |
| Mmp19         | ENSMUSG000000025355  | 226.1860891 | -2.258726748   | 0.458016892 | -4.931535905 | 8.15856E-07  | 0.000235478 | 86         | 76        | 52        | 153       | 385       | 288       | 543       |  |  |  |
| Mme11         | ENSMUSG000000058183  | 21.70531804 | -2.274134888   | 0.662951885 | -3.43028437  | 0.000602949  | 0.052052802 | 7          | 7         | 7         | 14        | 67        | 25        | 26        |  |  |  |
| Gulo          | ENSMUSG000000034450  | 50.30384936 | -2.278974873   | 0.552429213 | -4.125369947 | 3.70139E-05  | 0.006224134 | 14         | 25        | 8         | 77        | 119       | 74        | 35        |  |  |  |
| Ahmh2         | ENSMUSG000000023047  | 205.1019299 | -2.301715859   | 0.371905746 | -6.188976329 | 6.05652E-10  | 4.68414E-07 | 71         | 61        | 57        | 452       | 353       | 243       | 198       |  |  |  |
| Eyst3         | ENSMUSG000000037681  | 31.03648417 | -2.35340642    | 0.743123308 | -3.1669124   | 0.0001540667 | 0.09482755  | 13         | 6         | 108       | 27        | 42        | 13        | 43        |  |  |  |
| Fmo1          | ENSMUSG000000040181  | 270.8462693 | -2.385651942   | 0.582839211 | -4.09315622  | 4.25541E-05  | 0.00685759  | 65         | 77        | 95        | 112       | 650       | 243       | 654       |  |  |  |
| Tmem144       | ENSMUSG00000007956   | 148.5658883 | -2.389920292   | 0.434885623 | -5.495541733 | 3.89513E-08  | 1.75172E-05 | 39         | 26        | 65        | 128       | 233       | 270       | 280       |  |  |  |
| Ly6k          | ENSMUSG000000044678  | 489.0540166 | -2.44829952    | 0.594190934 | -4.120391911 | 3.78228E-05  | 0.006251438 | 189        | 180       | 45        | 981       | 290       | 553       | 1186      |  |  |  |
| Gabrg3        | ENSMUSG000000050526  | 185.1095907 | -2.456758825   | 0.294609873 | -8.339024085 | 7.49062E-17  | 1.44854E-13 | 67         | 51        | 38        | 316       | 258       | 269       | 297       |  |  |  |
| Awcc2         | ENSMUSG000000050830  | 15.02999312 | -2.485549885   | 0.649395463 | -3.82749053  | 0.000129456  | 0.016151143 | 4          | 6         | 3         | 31        | 20        | 29        | 13        |  |  |  |
| Fhdcl1        | ENSMUSG000000041842  | 44.16922598 | -2.529814669   | 0.62072919  | -4.075552927 | 4.59051E-05  | 0.007284574 | 13         | 8         | 15        | 38        | 25        | 110       | 101       |  |  |  |
| Lingo3        | ENSMUSG0000000051067 | 70.61842061 | -2.544562536   | 0.475576101 | -5.137781112 | 7.81762E-08  | 3.08525E-05 | 19         | 15        | 21        | 53        | 135       | 91        | 160       |  |  |  |
| Baalc         | ENSMUSG000000022296  | 8.472964165 | -2.554891508   | 0.79861601  | -3.199148871 | 0.00137834   | 0.08767873  | 4          | 2         | 1         | 13        | 9         | 12        | 18        |  |  |  |
| Cela1         | ENSMUSG000000023031  | 633.9321016 | -2.571735783   | 0.447421654 | -5.747910192 | 0.93576E-09  | 4.72253E-06 | 166        | 136       | 195       | 479       | 1663      | 1101      | 697       |  |  |  |
| 2810459M11Rik | ENSMUSG000000026227  | 18.60120055 | -2.587041103   | 0.591435529 | -4.374172633 | 1.21894E-05  | 0.00254497  | 4          | 8         | 35        | 32        | 29        | 69        | 21        |  |  |  |
| Cdo1          | ENSMUSG000000033022  | 142.8315765 | -2.591232582   | 0.778117758 | -3.330129093 | 0.000868057  | 0.065139807 | 64         | 30        | 16        | 70        | 349       | 44        | 426       |  |  |  |
| Rassf10       | ENSMUSG000000098132  | 68.24363666 | -2.6120476     | 0.520193498 | -5.021192996 | 5.13292E-07  | 0.000160078 | 15         | 8         | 29        | 119       | 144       | 58        | 104       |  |  |  |
| Cited4        | ENSMUSG000000070803  | 46.50323177 | -2.648380369   | 0.605216973 | -4.375918865 | 1.20923E-05  | 0.00254497  | 11         | 14        | 10        | 28        | 143       | 52        | 68        |  |  |  |
| Hadr          | ENSMUSG000000022865  | 120.0945972 | -2.710511317   | 0.497652054 | -5.446599276 | 5.1342E-08   | 2.15837E-05 | 44         | 33        | 9         | 247       | 191       | 174       | 142       |  |  |  |
| Cxcl15        | ENSMUSG000000049511  | 154.601061  | -2.723771806   | 0.503440841 | -5.410311568 | 6.29152E-08  | 2.58863E-05 | 22         | 66        | 22        | 255       | 297       | 293       | 127       |  |  |  |
| 4930245O10Rik | ENSMUSG000000105838  | 15.0433991  | -2.754441472   | 0.700401513 | -3.929805149 | 8.50147E-05  | 0.011742963 | 3          | 1         | 7         | 32        | 15        | 25        | 22        |  |  |  |
| Egff6         | ENSMUSG000000000402  | 2058.92027  | -2.763894532   | 0.506075537 | -5.461426858 | 4.72323E-08  | 2.07586E-05 | 500        | 673       | 260       | 5285      | 1825      | 4142      | 1728      |  |  |  |
| Cdh12         | ENSMUSG000000040452  | 61.23208544 | -2.77561066    | 0.526783605 | -5.268972697 | 1.37186E-07  | 4.91279E-05 | 12         | 15        | 16        | 128       | 55        | 52        | 152       |  |  |  |
| Ggt6          | ENSMUSG0000000040471 | 17.04239719 | -2.791458036   | 0.811953755 | -3.437951999 | 0.000586132  | 0.05082786  | 5          | 4         | 3         | 7         | 59        | 17        | 24        |  |  |  |
| Galm13        | ENSMUSG000000060988  | 9.884997685 | -2.800790278   | 0.88324904  | -3.171095226 | 0.001518654  | 0.093826586 | 3          | 1         | 3         | 5         | 15        | 26        | 17        |  |  |  |
| D43030616Rik  | ENSMUSG000000097466  | 14.10555832 | -2.813288318   | 0.724927936 | -3.880783424 | 0.000104121  | 0.013790978 | 2          | 5         | 3         | 21        | 11        | 36        | 21        |  |  |  |
| D430041D05Rik | ENSMUSG000000068373  | 155.8359259 | -2.860962051   | 0.504460578 | -5.671330184 | 1.41693E-08  | 7.02579E-06 | 34         | 32        | 36        | 76        | 310       | 283       | 320       |  |  |  |
| Mfsd4         | ENSMUSG000000059149  | 139.5038219 | -2.895041787   | 0.514953987 | -5.621942655 | 1.88822E-08  | 9.1286E-06  | 28         | 37        | 24        | 72        | 249       | 238       | 328       |  |  |  |
| Ctd1d1        | ENSMUSG000000028076  | 580.9496784 | -2.897799452   | 0.6037118   | -4.799971525 | 1.58688E-06  | 0.000420372 | 112        | 113       | 147       | 240       | 1913      | 531       | 1012      |  |  |  |
| Sstr2         | ENSMUSG000000047904  | 22.61254183 | -2.914115423   | 0.900577733 | -3.235828864 | 0.001212901  | 0.079779168 | 7          | 6         | 2         | 43        | 9         | 83        | 8         |  |  |  |
| Mme           | ENSMUSG000000027820  | 111.7661109 | -2.923466112   | 0.553890718 | -5.278055792 | 1.30562E-07  | 4.76378E-05 | 17         | 15        | 38        | 76        | 218       | 291       | 127       |  |  |  |
| 4930486L24Rik | ENSMUSG000000050345  | 79.45703757 | -2.926217556   | 0.391501956 | -7.474336994 | 7.75941E-14  | 9.37821E-11 | 17         | 12        | 20        | 130       | 83        | 146       | 147       |  |  |  |
| Cdh9          | ENSMUSG000000025370  | 15.46659329 | -2.948628556   | 0.741230012 | -3.978021004 | 6.94912E-05  | 0.00961121  | 3          | 5         | 2         | 10        | 24        | 40        | 24        |  |  |  |
| Dsp           | ENSMUSG0000000054889 | 330.654795  | -2.984161892   | 0.480539955 | -6.210018259 | 5.29784E-07  | 4.65681E-07 | 55         | 120       | 25        | 630       | 520       | 440       | 524       |  |  |  |
| Epn3          | ENSMUSG000000010080  | 95.20776037 | -3.010785114   | 0.493756336 | -6.097714386 | 1.07569E-09  | 7.43102E-07 | 24         | 25        | 8         | 165       | 176       | 80        | 189       |  |  |  |
| Hras1s        | ENSMUSG000000022525  | 22.52442587 | -3.108118811   | 0.785790595 |              |              |             |            |           |           |           |           |           |           |  |  |  |

**Table S5. Genes differentially expressed in ABC Male vs ABC Female**

| Gene          | ENSEMBL_Gene_ID     | baseMean    | log2FoldChange | lfcSE       | stat         | pvalue      | padj        | Read count |           |           |           |           |           |           |
|---------------|---------------------|-------------|----------------|-------------|--------------|-------------|-------------|------------|-----------|-----------|-----------|-----------|-----------|-----------|
|               |                     |             |                |             |              |             |             | 166836_No  | 166838_No | 182098_Tu | 184208_Tu | 183159_B2 | 8505_Norm | 207286_No |
| Apoc1         | ENSMUSG00000040564  | 486.444706  | -5.378689002   | 1.650847625 | -3.258137772 | 0.001121459 | 0.076093975 | 6          | 48        | 7         | 543       | 202       | 3         | 2597      |
| Cidea         | ENSMUSG00000024526  | 60.85767602 | -5.767356799   | 1.566332448 | -3.682077075 | 0.000231341 | 0.026161876 | 3          | 1         | 2         | 3         | 291       | 7         | 119       |
| Folr1         | ENSMUSG00000001827  | 21.63718195 | -5.856602024   | 1.498465116 | -3.908400645 | 9.29091E-05 | 0.012564175 | 2          | 0         | 0         | 6         | 107       | 3         | 33        |
| Orm2          | ENSMUSG000000061540 | 6.321953858 | -5.945781945   | 1.675771518 | -3.548086288 | 0.000388041 | 0.038481735 | 0          | 0         | 0         | 6         | 29        | 1         | 8         |
| Orm1          | ENSMUSG000000039196 | 23.08098032 | -5.947564422   | 1.582827191 | -3.757557652 | 0.00017158  | 0.02048155  | 0          | 0         | 2         | 8         | 118       | 1         | 33        |
| Adig          | ENSMUSG000000044405 | 36.45441964 | -6.032101992   | 1.810896968 | -3.331002315 | 0.000865339 | 0.065139807 | 3          | 0         | 0         | 9         | 172       | 5         | 66        |
| Oxtr          | ENSMUSG000000049112 | 315.5640977 | -6.214215352   | 0.622140777 | -9.988439241 | 1.71257E-23 | 4.73109E-20 | 4          | 13        | 5         | 175       | 698       | 593       | 721       |
| Tmxc2         | ENSMUSG000000050612 | 29.00536007 | -6.28462254    | 1.248323449 | -5.03445044  | 4.79222E-07 | 0.000154453 | 0          | 1         | 1         | 12        | 108       | 38        | 42        |
| Mgst2         | ENSMUSG000000074604 | 564.4611447 | -6.825243121   | 0.707233244 | -9.650625415 | 4.88568E-22 | 1.18099E-18 | 8          | 11        | 7         | 327       | 2438      | 669       | 492       |
| Ucp1          | ENSMUSG000000031710 | 46.68430773 | -6.982986604   | 2.210874044 | -3.158473284 | 0.001585978 | 0.096749689 | 2          | 0         | 0         | 2         | 180       | 2         | 141       |
| 170012SH20Rik | ENSMUSG000000018479 | 25.39644423 | -6.995469086   | 1.472460062 | -4.750871867 | 2.02541E-06 | 0.00052929  | 0          | 0         | 1         | 5         | 104       | 32        | 36        |
| Ly6h          | ENSMUSG000000022577 | 13.21714983 | -7.015838199   | 1.538218648 | -4.561014918 | 5.0907E-06  | 0.001246125 | 0          | 0         | 0         | 6         | 66        | 10        | 12        |
| Cyp2f2        | ENSMUSG000000052974 | 1249.062152 | -7.642574958   | 0.710533984 | -10.75610053 | 5.54679E-27 | 2.14528E-23 | 17         | 10        | 6         | 530       | 2029      | 1242      | 4909      |
| Xist          | ENSMUSG000000086503 | 979.6871197 | -9.79681836    | 0.793335221 | -12.34890133 | 4.93812E-35 | 4.77467E-31 | 2          | 1         | 3         | 3453      | 1356      | 1215      | 828       |
| Akr1d1        | ENSMUSG000000038641 | 2196.634761 | -14.40659791   | 1.361935368 | -10.57803347 | 3.76783E-26 | 1.21437E-22 | 0          | 0         | 0         | 749       | 7326      | 2999      | 4302      |

**Table S6. GSEA report for male ABC\_Hoxb9 tumours compared to male ABC tumours**

| NAME                                     | SIZE | ES         | NES        | NOM p-val   | FDR q-val  | FWER p-val | RANK AT MAX |
|------------------------------------------|------|------------|------------|-------------|------------|------------|-------------|
| HALLMARK_G2M_CHECKPOINT                  | 189  | 0.6468555  | 1.697571   | 0           | 0.04399998 | 0          | 2163        |
| HALLMARK_MYC_TARGETS_V2                  | 57   | 0.64348674 | 1.5850172  | 0           | 0.06618747 | 0.115      | 3399        |
| HALLMARK_E2F_TARGETS                     | 191  | 0.62671053 | 1.5686973  | 0           | 0.06945833 | 0.163      | 2932        |
| HALLMARK_SPERMATOGENESIS                 | 95   | 0.4395258  | 1.4903258  | 0.17158672  | 0.20406246 | 0.543      | 1001        |
| HALLMARK_MYC_TARGETS_V1                  | 191  | 0.51113737 | 1.4716262  | 0           | 0.18284994 | 0.543      | 4372        |
| HALLMARK_TNFA_SIGNALING_VIA_NFKB         | 183  | 0.3626254  | 1.3311056  | 0           | 0.34334636 | 0.808      | 1244        |
| HALLMARK_TGF_BETA_SIGNALING              | 52   | 0.30804762 | 1.1985636  | 0.102345414 | 0.6009473  | 0.947      | 2640        |
| HALLMARK_REACTIVE_OXIGEN_SPECIES_PATHWAY | 45   | 0.4346205  | 1.18057    | 0.31212723  | 0.59848905 | 0.947      | 4305        |
| HALLMARK_KRAS_SIGNALING_DN               | 123  | 0.31556696 | 1.1704465  | 0.17073171  | 0.5797694  | 1          | 1550        |
| HALLMARK_MITOTIC_SPINDLE                 | 198  | 0.45075125 | 1.1701288  | 0.10331384  | 0.5261925  | 1          | 1201        |
| HALLMARK_UV_RESPONSE_UP                  | 140  | 0.2766306  | 1.1253206  | 0.11044177  | 0.5694552  | 1          | 3332        |
| HALLMARK_OXIDATIVE_PHOSPHORYLATION       | 189  | 0.46338195 | 1.1154771  | 0.30604288  | 0.53661823 | 1          | 4469        |
| HALLMARK_FATTY_ACID_METABOLISM           | 142  | 0.30793777 | 1.1061171  | 0.41351888  | 0.50957435 | 1          | 2996        |
| HALLMARK_ESTROGEN_RESPONSE_LATE          | 172  | 0.28641844 | 1.0496027  | 0.3592233   | 0.5719434  | 1          | 1172        |
| HALLMARK_GLYCOLYSIS                      | 180  | 0.19225512 | 0.95989305 | 0.52642274  | 0.70349604 | 1          | 2646        |
| HALLMARK_PI3K_AKT_MTOR_SIGNALING         | 99   | 0.21583931 | 0.9114872  | 0.62355214  | 0.7756091  | 1          | 1283        |
| HALLMARK_DNA_REPAIR                      | 136  | 0.2382726  | 0.8295817  | 0.6276803   | 0.8557615  | 1          | 4594        |
| HALLMARK_P53_PATHWAY                     | 187  | 0.18670382 | 0.827854   | 0.6312849   | 0.81244224 | 1          | 3007        |
| HALLMARK_ADIPOGENESIS                    | 187  | 0.17481901 | 0.7299593  | 0.9116466   | 0.8920309  | 1          | 4100        |
| HALLMARK_ALLOGRAFT_REJECTION             | 169  | 0.16238579 | 0.46229643 | 0.915547    | 0.987912   | 1          | 1807        |
